# Supplementary material for: Emplacement Age of the Sevier Gravity Slide, Utah, USA
Source: Copernicus journal article supplement (doi:10.5194/egusphere-2024-2899), 2024-09-25
Supplement: Supplementary file 1 [file egusphere-2024-2899-supplement.zip]

## Sheet: S1
Table S1. Location data for samples of this study.
	Sample ID	Unit	Latitude	Longitude
	MP070920-3	volcanic rocks of Langdon Mountain	38.3674	-112.034
	PH030218-1	Antimony Tuff	38.1658	-112.033
	MP071020-2	Antimony Tuff	38.3747	-112.08
	24MGSC-37	Pseudotachylyte (Cherry Creek)	37.9605	-112.071
	21MGSC-01	Tuff of Tibadore	38.2159	-112.142
	21MGSC-02	Kingston Canyon Tuff	38.2146	-112.146
	MVC6-21-10-16-2	Mt. Dutton Formation	37.9138	-112.246
	KCT	Kingston Canyon Tuff	37.9102	-112.25

## Sheet: S2
Table S2.	Full analytical data for 40Ar/39Ar analyses of the Kingston Canyon Tuff and tuff of Tibadore
	Kingston Canyon Tuff
	Sample:	21MGSC-02			Identifier:	UF002:B09
	Material:	Plagioclase			Location:	38.215,-112.146
															Corrected1										Blanks
	N	Power	Age	±1σ	K/Ca	±1σ	Cum. %39Ar	%40Ar*	40Ar*/39ArK	±1σ	39Ar/40Ar	±1σ	36Ar/40Ar	±1σ	40Ar	±1σ	39Ar	±1σ	38Ar	±1σ	37Ar	±1σ	36Ar	±1σ	40Ar	±1σ	39Ar	±1σ	38Ar	±1σ	37Ar	±1σ	36Ar	±1σ	J	±1σ	39Ar Decay	37Ar Decay	LambdaK	MonitorAge	MonitorName	MonitorMaterial	(40Ar/3939)K	±1σ	(38Ar/3939)K	±1σ	(37Ar/3939)K	±1σ	(39Ar/3737)Ca
		%	(Ma)	(Ma)			(%)	(%)							(Volts)		(Volts)		(Volts)		(Volts)		(Volts)		(cps)		(cps)		(cps)		(cps)		(cps)
X	01	30	25.5108	0.228017	0.167455	0.00136972	3.98743	17.5511	3.5186	0.0316692	0.0498829	4.44724e-05	0.00276153	4.37951e-06	0.0368839	1.14965e-05	0.00184044	1.53313e-06	4.19236e-05	5.85426e-07	7.95203e-05	6.45821e-07	0.000103132	1.58013e-07	5.53834e-05	6.23745e-07	1.65204e-07	2.03707e-07	-1.99064e-07	1.16438e-07	1.85244e-07	1.33565e-07	2.44461e-07	7.09274e-09	0.00398928	1.1209e-06	1.00146	59.5586	5.464e-10	28.201	FC-2	sanidine	0.00073	9e-05	0.01215	3e-05	0.000224	1.6e-05	0.000702
	02	30	25.8775	0.0934327	0.136443	0.00286711	5.29576	83.3239	3.56954	0.0129794	0.23347	0.000365786	0.000558075	8.97433e-06	0.00258606	2.03202e-06	0.00060412	8.15959e-07	8.34108e-06	4.78541e-07	3.201e-05	6.69702e-07	1.95849e-06	2.04997e-08	5.53834e-05	6.23745e-07	1.65204e-07	2.03707e-07	-1.99064e-07	1.16438e-07	1.85244e-07	1.33565e-07	2.44461e-07	7.09274e-09	0.00398928	1.1209e-06	1.00146	59.5803	5.464e-10	28.201	FC-2	sanidine	0.00073	9e-05	0.01215	3e-05	0.000224	1.6e-05	0.000702
X	03	30	25.4688	0.202697	0.123206	0.00398753	6.0536	44.4947	3.51278	0.0281519	0.126677	0.000290691	0.00185896	1.1122e-05	0.00276054	1.9027e-06	0.000350012	7.63493e-07	5.17573e-06	4.79457e-07	2.05166e-05	6.60833e-07	5.46178e-06	2.85695e-08	5.14705e-05	8.41099e-07	1.72661e-07	1.93833e-07	5.3135e-08	1.41125e-07	2.72206e-07	1.42958e-07	2.42588e-07	7.04541e-09	0.00398928	1.1209e-06	1.00146	59.6288	5.464e-10	28.201	FC-2	sanidine	0.00073	9e-05	0.01215	3e-05	0.000224	1.6e-05	0.000702
X	04	30	26.0618	0.374845	0.145621	0.00134454	8.70848	11.4162	3.59515	0.0520777	0.0317553	3.04925e-05	0.00296703	4.55185e-06	0.038576	1.47729e-05	0.00122571	1.07592e-06	3.72077e-05	4.73769e-07	6.07899e-05	5.57526e-07	0.000115433	1.69774e-07	5.17401e-05	5.23222e-07	-2.12405e-07	1.80394e-07	1.56137e-07	1.47003e-07	2.47589e-07	1.01894e-07	2.26452e-07	6.84016e-09	0.00398928	1.1209e-06	1.00146	59.6504	5.464e-10	28.201	FC-2	sanidine	0.00073	9e-05	0.01215	3e-05	0.000224	1.6e-05	0.000702
X	05	30	25.4131	0.0905121	0.166138	0.000930567	13.9164	42.9072	3.50503	0.0125705	0.122427	0.000120023	0.00191214	4.4643e-06	0.0196295	6.98982e-06	0.00240382	2.18989e-06	3.67663e-05	5.95739e-07	0.000104439	5.76051e-07	3.92157e-05	8.60556e-08	5.30937e-05	4.9945e-07	-6.89756e-08	1.82019e-07	2.06412e-07	1.55462e-07	3.75814e-07	1.24036e-07	2.43683e-07	7.06361e-09	0.00398928	1.1209e-06	1.00146	59.699	5.464e-10	28.201	FC-2	sanidine	0.00073	9e-05	0.01215	3e-05	0.000224	1.6e-05	0.000702
X	06	30	25.7029	0.139989	0.15705	0.00234437	15.446	51.5015	3.54528	0.019445	0.145283	0.000204713	0.00162423	8.87634e-06	0.00485833	2.77408e-06	0.000706085	9.07136e-07	1.03286e-05	3.85626e-07	3.24372e-05	4.81436e-07	8.41366e-06	4.21637e-08	5.30937e-05	4.9945e-07	-6.89756e-08	1.82019e-07	2.06412e-07	1.55462e-07	3.75814e-07	1.24036e-07	2.43683e-07	7.06361e-09	0.00398928	1.1209e-06	1.00146	59.7205	5.464e-10	28.201	FC-2	sanidine	0.00073	9e-05	0.01215	3e-05	0.000224	1.6e-05	0.000702
X	07	30	25.6761	0.0966813	0.149323	0.00134526	18.5581	51.6505	3.54157	0.0134292	0.145856	0.000132906	0.00161924	6.04562e-06	0.00984585	4.38819e-06	0.00143673	1.13788e-06	2.04294e-05	4.12332e-07	6.93544e-05	6.21076e-07	1.7061e-05	5.82067e-08	5.24569e-05	5.41965e-07	3.89247e-07	1.96734e-07	1.4031e-07	1.26926e-07	7.38432e-08	1.42893e-07	2.46989e-07	7.27532e-09	0.00398928	1.1209e-06	1.00147	59.7691	5.464e-10	28.201	FC-2	sanidine	0.00073	9e-05	0.01215	3e-05	0.000224	1.6e-05	0.000702
X	08	30	25.8957	0.240649	0.206841	0.0101879	19.0589	52.1631	3.57207	0.0334306	0.146046	0.00035081	0.00160207	1.55507e-05	0.00158237	1.36842e-06	0.000231074	5.16705e-07	3.37522e-06	3.65699e-07	8.05452e-06	3.9569e-07	2.66494e-06	2.36553e-08	5.24569e-05	5.41965e-07	3.89247e-07	1.96734e-07	1.4031e-07	1.26926e-07	7.38432e-08	1.42893e-07	2.46989e-07	7.27532e-09	0.00398928	1.1209e-06	1.00147	59.7907	5.464e-10	28.201	FC-2	sanidine	0.00073	9e-05	0.01215	3e-05	0.000224	1.6e-05	0.000702
X	09	30	25.6932	0.0704919	0.172239	0.00100708	24.0907	59.9706	3.54394	0.00979156	0.169241	0.000185979	0.0013405	4.66914e-06	0.0137199	8.69658e-06	0.00232235	2.07904e-06	3.20527e-05	4.49924e-07	9.71033e-05	5.60003e-07	1.99592e-05	6.22796e-08	4.97001e-05	5.13607e-07	2.21544e-07	2.16433e-07	7.38593e-08	1.03178e-07	6.17194e-08	1.3203e-07	2.3136e-07	7.2541e-09	0.00398928	1.1209e-06	1.00147	59.8395	5.464e-10	28.201	FC-2	sanidine	0.00073	9e-05	0.01215	3e-05	0.000224	1.6e-05	0.000702
X	10	30	26.1071	0.218532	0.12263	0.000469844	30.7327	16.2115	3.60143	0.0303617	0.0450156	3.10485e-05	0.0028064	3.47463e-06	0.068081	1.95074e-05	0.00306767	1.91523e-06	7.60565e-05	4.97186e-07	0.000179958	6.78467e-07	0.000193968	2.29807e-07	4.97001e-05	5.13607e-07	2.21544e-07	2.16433e-07	7.38593e-08	1.03178e-07	6.17194e-08	1.3203e-07	2.3136e-07	7.2541e-09	0.00398928	1.1209e-06	1.00147	59.8611	5.464e-10	28.201	FC-2	sanidine	0.00073	9e-05	0.01215	3e-05	0.000224	1.6e-05	0.000702
	11	30	25.9673	0.0821516	0.1602	0.00222959	32.7781	69.9296	3.58201	0.0114128	0.195252	0.000210429	0.00100685	6.86513e-06	0.00483424	2.06836e-06	0.00094416	9.31039e-07	1.23105e-05	5.88878e-07	4.23884e-05	5.87293e-07	5.55273e-06	3.17044e-08	4.92337e-05	4.5189e-07	5.90709e-08	2.46662e-07	-3.65006e-08	1.22027e-07	2.24799e-07	1.24521e-07	2.34201e-07	6.90169e-09	0.00398928	1.1209e-06	1.00147	59.9101	5.464e-10	28.201	FC-2	sanidine	0.00073	9e-05	0.01215	3e-05	0.000224	1.6e-05	0.000702
X	12	30	25.5334	0.170125	0.206687	0.00717873	33.8649	47.3232	3.52174	0.0236289	0.134388	0.000220135	0.00176421	1.00315e-05	0.00373157	2.21052e-06	0.000501426	7.64019e-07	7.41766e-06	3.74344e-07	1.745e-05	6.04542e-07	6.86518e-06	3.59102e-08	4.92337e-05	4.5189e-07	5.90709e-08	2.46662e-07	-3.65006e-08	1.22027e-07	2.24799e-07	1.24521e-07	2.34201e-07	6.90169e-09	0.00398928	1.1209e-06	1.00147	59.9319	5.464e-10	28.201	FC-2	sanidine	0.00073	9e-05	0.01215	3e-05	0.000224	1.6e-05	0.000702
X	13	30	25.6344	0.10295	0.175211	0.00321884	35.9754	56.0167	3.53577	0.0142996	0.158447	0.000191974	0.00147296	7.00353e-06	0.00614657	2.33719e-06	0.000974047	1.11758e-06	1.34763e-05	5.73664e-07	3.99431e-05	7.31035e-07	9.69989e-06	4.12219e-08	5.10868e-05	5.61488e-07	1.31205e-07	2.39812e-07	8.25237e-08	1.87469e-07	1.83786e-07	1.2273e-07	2.34562e-07	6.8205e-09	0.00398928	1.1209e-06	1.00147	59.981	5.464e-10	28.201	FC-2	sanidine	0.00073	9e-05	0.01215	3e-05	0.000224	1.6e-05	0.000702
X	14	30	25.9924	0.148274	0.165961	0.00582894	36.9369	62.4173	3.58551	0.0205991	0.174105	0.000311885	0.00125853	1.11773e-05	0.00254848	1.74652e-06	0.000443803	7.32382e-07	5.83694e-06	5.46959e-07	1.92048e-05	6.72488e-07	3.5182e-06	2.62134e-08	5.10868e-05	5.61488e-07	1.31205e-07	2.39812e-07	8.25237e-08	1.87469e-07	1.83786e-07	1.2273e-07	2.34562e-07	6.8205e-09	0.00398928	1.1209e-06	1.00147	60.0026	5.464e-10	28.201	FC-2	sanidine	0.00073	9e-05	0.01215	3e-05	0.000224	1.6e-05	0.000702
	15	30	26.0816	0.0839001	0.171811	0.00258036	39.1506	70.3123	3.5979	0.0116565	0.195454	0.000201853	0.000994028	7.06903e-06	0.00522658	2.44713e-06	0.00102171	9.37608e-07	1.29848e-05	5.81406e-07	4.2675e-05	6.38533e-07	5.88685e-06	3.53573e-08	5.18292e-05	5.85954e-07	1.00829e-07	2.0892e-07	2.36189e-07	1.92968e-07	3.2433e-07	1.37362e-07	2.34393e-07	7.13414e-09	0.00398928	1.1209e-06	1.00147	60.0518	5.464e-10	28.201	FC-2	sanidine	0.00073	9e-05	0.01215	3e-05	0.000224	1.6e-05	0.000702
X	16	30	25.6366	0.171267	0.161233	0.00494441	40.1738	50.0428	3.53608	0.0237888	0.141535	0.000231895	0.0016731	1.06746e-05	0.00333605	2.02141e-06	0.000472313	7.16859e-07	7.041e-06	5.1076e-07	2.10118e-05	6.423e-07	5.92208e-06	3.38719e-08	5.18292e-05	5.85954e-07	1.00829e-07	2.0892e-07	2.36189e-07	1.92968e-07	3.2433e-07	1.37362e-07	2.34393e-07	7.13414e-09	0.00398928	1.1209e-06	1.00147	60.0734	5.464e-10	28.201	FC-2	sanidine	0.00073	9e-05	0.01215	3e-05	0.000224	1.6e-05	0.000702
	17	30	26.0804	0.12778	0.133084	0.00347632	41.1988	73.857	3.59772	0.0177528	0.205319	0.000397976	0.000875267	1.09799e-05	0.00230377	2.00524e-06	0.000473316	8.16998e-07	5.26585e-06	4.73349e-07	2.54787e-05	6.62518e-07	2.42968e-06	2.2809e-08	5.09678e-05	4.39935e-07	1.03365e-07	2.06302e-07	2.4186e-07	1.54895e-07	5.70687e-07	1.21225e-07	2.30256e-07	7.19768e-09	0.00398928	1.1209e-06	1.00147	60.1229	5.464e-10	28.201	FC-2	sanidine	0.00073	9e-05	0.01215	3e-05	0.000224	1.6e-05	0.000702
X	18	30	25.81	0.0795955	0.160769	0.002087	43.8194	66.5152	3.56016	0.0110568	0.186857	0.000206136	0.00112124	6.27695e-06	0.00647175	2.7369e-06	0.00120963	1.22884e-06	1.544e-05	4.33494e-07	5.39042e-05	6.96225e-07	8.13109e-06	3.88639e-08	5.09678e-05	4.39935e-07	1.03365e-07	2.06302e-07	2.4186e-07	1.54895e-07	5.70687e-07	1.21225e-07	2.30256e-07	7.19768e-09	0.00398928	1.1209e-06	1.00147	60.1446	5.464e-10	28.201	FC-2	sanidine	0.00073	9e-05	0.01215	3e-05	0.000224	1.6e-05	0.000702
X	19	30	25.9016	0.14095	0.195981	0.00417718	45.3617	47.2522	3.57289	0.0195806	0.132265	0.000170279	0.00176659	8.1274e-06	0.00538093	2.78243e-06	0.000711692	8.37122e-07	1.02141e-05	5.37395e-07	2.60044e-05	5.52508e-07	9.92779e-06	4.25042e-08	5.11672e-05	4.26065e-07	1.21302e-07	2.09706e-07	1.93327e-08	1.30264e-07	5.13422e-07	1.3418e-07	2.43171e-07	7.28429e-09	0.00398928	1.1209e-06	1.00147	60.1943	5.464e-10	28.201	FC-2	sanidine	0.00073	9e-05	0.01215	3e-05	0.000224	1.6e-05	0.000702
X	20	30	25.513	0.216521	0.149484	0.000595075	50.3547	17.5188	3.51891	0.0300725	0.0497866	4.00497e-05	0.00276261	4.05009e-06	0.0462743	1.38855e-05	0.00230504	1.71488e-06	5.38683e-05	5.61262e-07	0.000110325	4.30498e-07	0.000129629	1.83274e-07	5.11672e-05	4.26065e-07	1.21302e-07	2.09706e-07	1.93327e-08	1.30264e-07	5.13422e-07	1.3418e-07	2.43171e-07	7.28429e-09	0.00398928	1.1209e-06	1.00147	60.2162	5.464e-10	28.201	FC-2	sanidine	0.00073	9e-05	0.01215	3e-05	0.000224	1.6e-05	0.000702
	21	30	26.0479	0.0666289	0.149043	0.00113636	53.4945	72.1835	3.59321	0.00925678	0.200918	0.000187878	0.000931333	5.67273e-06	0.00721153	2.36551e-06	0.00144953	1.26508e-06	1.8273e-05	4.50902e-07	6.95262e-05	5.25482e-07	7.84718e-06	3.98989e-08	5.1744e-05	6.27624e-07	4.54495e-07	2.30657e-07	2.66978e-07	1.56998e-07	6.34131e-07	1.17459e-07	2.29698e-07	7.14237e-09	0.00398928	1.1209e-06	1.00147	60.2656	5.464e-10	28.201	FC-2	sanidine	0.00073	9e-05	0.01215	3e-05	0.000224	1.6e-05	0.000702
X	22	30	26.006	0.216014	0.165938	0.00152218	57.3678	19.097	3.58739	0.0300102	0.0532356	4.10004e-05	0.00270975	4.49431e-06	0.0335722	9.34352e-06	0.0017878	1.27989e-06	3.88229e-05	4.94198e-07	7.7009e-05	7.02906e-07	9.22231e-05	1.48275e-07	4.99322e-05	5.16023e-07	2.55421e-07	2.14569e-07	-1.48738e-07	1.07986e-07	1.59121e-08	1.47257e-07	2.50782e-07	7.17217e-09	0.00398928	1.1209e-06	1.00147	60.2874	5.464e-10	28.201	FC-2	sanidine	0.00073	9e-05	0.01215	3e-05	0.000224	1.6e-05	0.000702
X	23	30	25.5399	0.265887	0.149526	0.00397226	58.1703	33.2147	3.52265	0.0369294	0.0942956	0.000198332	0.00223684	1.11133e-05	0.0039269	2.10342e-06	0.000370468	7.51561e-07	5.97178e-06	5.24809e-07	1.76167e-05	4.65647e-07	9.07154e-06	4.27026e-08	5.28678e-05	5.05312e-07	3.64392e-07	1.86032e-07	3.73132e-10	1.50319e-07	-1.96178e-08	1.54355e-07	2.52061e-07	7.23087e-09	0.00398928	1.1209e-06	1.00147	60.5921	5.464e-10	28.201	FC-2	sanidine	0.00073	9e-05	0.01215	3e-05	0.000224	1.6e-05	0.000702
X	24	30	25.6606	0.0600169	0.147113	0.000663192	64.0556	65.2187	3.53941	0.0083364	0.184289	0.000157696	0.00116468	4.54732e-06	0.0147368	5.89083e-06	0.00271705	2.04827e-06	3.65831e-05	4.80467e-07	0.000131275	5.82162e-07	1.93111e-05	6.5884e-08	5.28678e-05	5.05312e-07	3.64392e-07	1.86032e-07	3.73132e-10	1.50319e-07	-1.96178e-08	1.54355e-07	2.52061e-07	7.23087e-09	0.00398928	1.1209e-06	1.00147	60.6116	5.464e-10	28.201	FC-2	sanidine	0.00073	9e-05	0.01215	3e-05	0.000224	1.6e-05	0.000702
X	25	30	25.7716	0.100539	0.153919	0.00102326	68.1266	43.9826	3.55483	0.0139658	0.123738	0.000113166	0.00187612	5.20455e-06	0.0151817	5.69805e-06	0.00187931	1.5625e-06	2.80825e-05	5.26853e-07	8.67255e-05	5.70838e-07	2.99013e-05	7.76846e-08	5.3912e-05	5.12134e-07	2.08559e-07	1.89843e-07	2.36026e-09	1.3922e-07	1.52652e-07	1.5126e-07	2.50474e-07	7.021e-09	0.00398928	1.1209e-06	1.00147	60.6585	5.464e-10	28.201	FC-2	sanidine	0.00073	9e-05	0.01215	3e-05	0.000224	1.6e-05	0.000702
	26	30	25.8762	0.0567796	0.177626	0.00126318	71.6832	73.4062	3.56936	0.00788766	0.205688	0.000191815	0.000890366	4.75898e-06	0.00797956	3.20477e-06	0.00164143	1.37759e-06	2.18085e-05	5.19135e-07	6.56352e-05	4.62651e-07	8.17981e-06	3.70565e-08	5.26685e-05	5.77957e-07	3.50021e-07	2.04468e-07	-2.57138e-08	1.25207e-07	1.62841e-07	1.46312e-07	2.55288e-07	6.94545e-09	0.00398928	1.1209e-06	1.00147	60.6778	5.464e-10	28.201	FC-2	sanidine	0.00073	9e-05	0.01215	3e-05	0.000224	1.6e-05	0.000702
X	27	30	25.4194	0.215596	0.181308	0.00828882	72.2437	53.0327	3.5059	0.0299425	0.151284	0.00030855	0.00157293	1.44831e-05	0.00170957	1.33953e-06	0.000258652	4.85709e-07	3.41141e-06	5.35273e-07	1.01252e-05	4.61685e-07	2.85476e-06	2.34715e-08	5.2685e-05	5.41e-07	2.09909e-07	2.12908e-07	-3.25838e-09	1.39548e-07	3.3067e-07	1.08797e-07	2.50767e-07	7.11146e-09	0.00398928	1.1209e-06	1.00147	60.7245	5.464e-10	28.201	FC-2	sanidine	0.00073	9e-05	0.01215	3e-05	0.000224	1.6e-05	0.000702
X	28	30	27.192	0.0771723	0.597947	0.0118685	76.7655	55.6332	3.7522	0.0107283	0.148284	0.000128887	0.00148582	4.72353e-06	0.0140716	6.13134e-06	0.00208436	1.5661e-06	2.86631e-05	4.73928e-07	2.4767e-05	4.90839e-07	2.13118e-05	6.53303e-08	5.2685e-05	5.41e-07	2.09909e-07	2.12908e-07	-3.25838e-09	1.39548e-07	3.3067e-07	1.08797e-07	2.50767e-07	7.11146e-09	0.00398928	1.1209e-06	1.00147	60.7438	5.464e-10	28.201	FC-2	sanidine	0.00073	9e-05	0.01215	3e-05	0.000224	1.6e-05	0.000702
	29	30	25.9681	0.0480605	0.165795	0.00135468	80.1	84.8269	3.58213	0.00667677	0.236847	0.000194597	0.000507718	4.68097e-06	0.00649709	2.07785e-06	0.00153909	1.16078e-06	1.9101e-05	4.75029e-07	6.58041e-05	5.34342e-07	4.37879e-06	2.90474e-08	5.17846e-05	5.42342e-07	3.7576e-07	2.14448e-07	4.46385e-08	1.39878e-07	2.55132e-07	1.31232e-07	2.48124e-07	6.86259e-09	0.00398928	1.1209e-06	1.00147	60.7905	5.464e-10	28.201	FC-2	sanidine	0.00073	9e-05	0.01215	3e-05	0.000224	1.6e-05	0.000702
X	32	30	25.9279	0.0769732	0.186606	0.000814588	89.4653	43.1469	3.57654	0.0106932	0.120649	9.47604e-05	0.00190412	3.59098e-06	0.0358188	1.15429e-05	0.00432178	3.08738e-06	6.52633e-05	5.79886e-07	0.000163976	7.04891e-07	7.0894e-05	1.26116e-07	5.02203e-05	6.15686e-07	3.46556e-08	2.2738e-07	1.1708e-07	1.29586e-07	2.59943e-07	1.47784e-07	2.40592e-07	6.90679e-09	0.00398928	1.1209e-06	1.00147	60.8759	5.464e-10	28.201	FC-2	sanidine	0.00073	9e-05	0.01215	3e-05	0.000224	1.6e-05	0.000702
X	34	30	25.9499	0.0800986	0.200063	0.00123055	95.0388	48.4861	3.5796	0.0111275	0.135464	0.000119469	0.00172525	4.44643e-06	0.0189858	5.3349e-06	0.00257175	2.145e-06	3.70192e-05	4.49658e-07	9.09249e-05	5.5318e-07	3.42489e-05	8.33752e-08	4.93935e-05	6.32521e-07	-2.85888e-07	2.29831e-07	2.7886e-07	1.05065e-07	1.09211e-07	1.38209e-07	2.49191e-07	7.28271e-09	0.00398928	1.1209e-06	1.00147	60.9423	5.464e-10	28.201	FC-2	sanidine	0.00073	9e-05	0.01215	3e-05	0.000224	1.6e-05	0.000702
X	35	30	25.9933	0.123906	0.155196	0.00214667	97.2363	44.2048	3.58562	0.0172138	0.123295	0.000137381	0.00186868	6.58242e-06	0.00822421	2.73958e-06	0.00101439	1.07546e-06	1.51158e-05	5.47863e-07	4.61756e-05	6.35522e-07	1.61278e-05	5.2844e-08	5.03693e-05	4.40132e-07	-8.6484e-08	2.03069e-07	1.82541e-07	1.30496e-07	4.29126e-08	1.43295e-07	2.40539e-07	7.06386e-09	0.00398928	1.1209e-06	1.00147	60.9894	5.464e-10	28.201	FC-2	sanidine	0.00073	9e-05	0.01215	3e-05	0.000224	1.6e-05	0.000702
X	36	30	25.4884	0.139119	0.153283	0.00137545	100	35.0115	3.51549	0.019322	0.0995993	9.06151e-05	0.00217665	5.83897e-06	0.0128041	6.15329e-06	0.00127583	9.82293e-07	2.12291e-05	5.28449e-07	5.87808e-05	5.24424e-07	2.8837e-05	7.30184e-08	5.03693e-05	4.40132e-07	-8.6484e-08	2.03069e-07	1.82541e-07	1.30496e-07	4.29126e-08	1.43295e-07	2.40539e-07	7.06386e-09	0.00398928	1.1209e-06	1.00147	61.0088	5.464e-10	28.201	FC-2	sanidine	0.00073	9e-05	0.01215	3e-05	0.000224	1.6e-05	0.000702
Weighted mean K/Ca ±2σ					0.160976	0.0109751	SEM, but if MSWD>1 use SEM * sqrt(MSWD)
Weighted mean Age ±2σ			25.9695	0.0611755	n=7/33	MSWD=1.266
Isochron Age ±2σ			25.8993	0.168434		MSWD=1.400
(40Ar/36Ar)trapped ±2σ			301.174	5.94224
	Tuff of Tibadore
	Sample:	21MGSC-01			Identifier:	UF002:A03
	Material:	Plagioclase			Location:	38.216,-112.142
															Corrected1										Blanks
	N	Power	Age	±1σ	K/Ca	±1σ	Cum. %39Ar	%40Ar*	40Ar*/39ArK	±1σ	39Ar/40Ar	±1σ	36Ar/40Ar	±1σ	40Ar	±1σ	39Ar	±1σ	38Ar	±1σ	37Ar	±1σ	36Ar	±1σ	40Ar	±1σ	39Ar	±1σ	38Ar	±1σ	37Ar	±1σ	36Ar	±1σ	J	±1σ	39Ar Decay	37Ar Decay	LambdaK	MonitorAge	MonitorName	MonitorMaterial	(40Ar/3939)K	±1σ	(38Ar/3939)K	±1σ	(37Ar/3939)K	±1σ	(39Ar/3737)Ca
		%	(Ma)	(Ma)			(%)	(%)							(Volts)		(Volts)		(Volts)		(Volts)		(Volts)		(cps)		(cps)		(cps)		(cps)		(cps)
	01	30	25.4802	0.0393112	0.0999592	0.000360535	17.3064	97.3377	3.55206	0.00551841	0.274086	0.000287865	8.85206e-05	3.69661e-06	0.00849589	4.73582e-06	0.00233203	2.06455e-06	2.85005e-05	4.85172e-07	0.000229109	7.98372e-07	3.46446e-06	2.96671e-08	6.07193e-05	5.84637e-07	6.91514e-09	2.56715e-07	-1.3462e-07	1.53043e-07	-9.37323e-08	1.38371e-07	1.64634e-07	8.11069e-09	0.00394693	1.05432e-06	1.00135	43.8206	5.464e-10	28.201	FC-2	sanidine	0.00073	9e-05	0.01215	3e-05	0.000224	1.6e-05	0.000702
	04	30	25.35	0.0521585	0.115097	0.000629151	28.1817	92.4245	3.53379	0.00732137	0.261595	0.000291055	0.000253143	5.3679e-06	0.00559368	2.31368e-06	0.00146486	1.50675e-06	1.81982e-05	5.01457e-07	0.000124872	6.68498e-07	2.89613e-06	2.88641e-08	6.88108e-05	5.29001e-07	2.30795e-07	2.73611e-07	8.66121e-08	1.84247e-07	1.13849e-07	1.64458e-07	1.88169e-07	7.93762e-09	0.00394693	1.05432e-06	1.00135	43.8786	5.464e-10	28.201	FC-2	sanidine	0.00073	9e-05	0.01215	3e-05	0.000224	1.6e-05	0.000702
	05	30	25.3316	0.138659	0.0947615	0.000507575	35.3028	41.7405	3.5312	0.0194631	0.118215	0.00014056	0.00195123	7.20609e-06	0.00810432	2.58294e-06	0.000959728	1.09437e-06	1.57978e-05	5.69857e-07	9.92384e-05	5.17583e-07	1.69898e-05	5.78222e-08	7.68964e-05	4.95416e-07	-5.20833e-07	2.49927e-07	-8.15517e-07	1.77406e-07	-1.33956e-06	1.82412e-07	2.18478e-07	7.73158e-09	0.00394693	1.05432e-06	1.00135	43.911	5.464e-10	28.201	FC-2	sanidine	0.00073	9e-05	0.01215	3e-05	0.000224	1.6e-05	0.000702
	06	30	25.3366	0.115579	0.0896483	0.00054431	42.3981	53.6444	3.53191	0.0162234	0.151902	0.000162518	0.00155244	7.787e-06	0.00628434	2.80332e-06	0.000956424	9.24902e-07	1.45698e-05	5.3473e-07	0.000104488	6.24092e-07	1.09953e-05	4.81322e-08	7.68964e-05	4.95416e-07	-5.20833e-07	2.49927e-07	-8.15517e-07	1.77406e-07	-1.33956e-06	1.82412e-07	2.18478e-07	7.73158e-09	0.00394693	1.05432e-06	1.00135	43.9237	5.464e-10	28.201	FC-2	sanidine	0.00073	9e-05	0.01215	3e-05	0.000224	1.6e-05	0.000702
	07	30	25.3726	0.0646858	0.0972591	0.000641995	50.0053	86.9383	3.53697	0.00907991	0.245843	0.000308464	0.000436968	6.4241e-06	0.00416341	2.38883e-06	0.00102516	1.1384e-06	1.21748e-05	5.40522e-07	0.000103184	6.69198e-07	3.04418e-06	2.54447e-08	8.01717e-05	5.06182e-07	-1.53544e-06	2.33407e-07	-1.72253e-06	1.4993e-07	-3.07694e-06	1.62325e-07	2.20671e-07	8.03734e-09	0.00394693	1.05432e-06	1.00136	43.9561	5.464e-10	28.201	FC-2	sanidine	0.00073	9e-05	0.01215	3e-05	0.000224	1.6e-05	0.000702
	08	30	25.4422	0.0394016	0.0988841	0.000321263	66.7427	92.3083	3.54673	0.005531	0.260312	0.000241913	0.000257038	3.83076e-06	0.00865124	2.98114e-06	0.00225543	1.93582e-06	2.72148e-05	6.10632e-07	0.00022323	6.97055e-07	4.87496e-06	3.18299e-08	8.01717e-05	5.06182e-07	-1.53544e-06	2.33407e-07	-1.72253e-06	1.4993e-07	-3.07694e-06	1.62325e-07	2.20671e-07	8.03734e-09	0.00394693	1.05432e-06	1.00136	43.9689	5.464e-10	28.201	FC-2	sanidine	0.00073	9e-05	0.01215	3e-05	0.000224	1.6e-05	0.000702
	11	30	25.4546	0.0406684	0.0921213	0.000368866	84.133	91.2176	3.54847	0.00570886	0.25711	0.000234632	0.000293587	3.99282e-06	0.00910065	3.41423e-06	0.00234393	1.93766e-06	2.89154e-05	4.99615e-07	0.000248525	9.70207e-07	5.62891e-06	3.41498e-08	0.000104757	5.34375e-07	-1.51633e-06	2.75103e-07	-1.88384e-06	1.77451e-07	-2.75084e-06	2.2412e-07	3.21987e-07	9.30963e-09	0.00394693	1.05432e-06	1.00136	44.0466	5.464e-10	28.201	FC-2	sanidine	0.00073	9e-05	0.01215	3e-05	0.000224	1.6e-05	0.000702
X	13	30	25.9138	0.0793432	0.133978	0.00105975	93.3213	63.2002	3.61295	0.0111407	0.174949	0.000215176	0.00123231	5.78469e-06	0.00706615	2.47825e-06	0.00123717	1.4539e-06	1.72476e-05	6.16657e-07	8.97079e-05	7.00028e-07	9.78119e-06	3.98491e-08	7.12122e-05	6.50439e-07	-1.48307e-06	2.41994e-07	-1.9537e-06	1.64309e-07	-2.81632e-06	1.81098e-07	2.1249e-07	8.70161e-09	0.00394693	1.05432e-06	1.00136	44.3319	5.464e-10	28.201	FC-2	sanidine	0.00073	9e-05	0.01215	3e-05	0.000224	1.6e-05	0.000702
	15	30	25.3119	0.098587	0.111803	0.000926641	100	58.9795	3.52844	0.0138381	0.167175	0.000188035	0.0013737	7.18754e-06	0.00537497	2.60547e-06	0.000899618	9.09212e-07	1.31656e-05	5.90677e-07	6.81625e-05	5.59146e-07	8.3189e-06	3.76592e-08	5.25265e-05	7.27697e-07	-5.03992e-07	2.70381e-07	-2.42634e-08	1.46691e-07	2.03843e-07	1.20007e-07	1.99468e-07	8.12899e-09	0.00394693	1.05432e-06	1.00141	50.8197	5.464e-10	28.201	FC-2	sanidine	0.00073	9e-05	0.01215	3e-05	0.000224	1.6e-05	0.000702
Weighted mean K/Ca ±2σ					0.0979251	0.00478799	SEM, but if MSWD>1 use SEM * sqrt(MSWD)
Weighted mean Age ±2σ			25.4255	0.0425314	n=8/9	MSWD=1.110
Isochron Age ±2σ			25.4444	0.0462838		MSWD=0.850
(40Ar/36Ar)trapped ±2σ			297.056	1.78834
Notes:
1Corrected: Isotopic intensities corrected for blank, baseline, radioactivity decay and detector intercalibration, not for interfering reactions.
X symbol preceding sample ID denotes analyses excluded from weighted-mean age calculations.
pX symbol preceding sample ID denotes analyses excluded from plateau age calculations.
Errors quoted for individual analyses include analytical error only, without interfering reactions or J uncertainties.
Integrated age calculated by summing isotopic measurements of all steps.
Plateau age is inverse-variance-weighted mean of selected steps.
Plateau age error is inverse-variance-weighted mean error (Taylor, 1982) times root MSWD where MSWD>1.
Decay constants and isotopic abundances after Min et al. (2000)
Ages calculated relative to 28.201 Ma Fish Canyon sanidine standard (Kuiper et al., 2008)
[truncated: 7 more columns]

## Sheet: S3
Table S3.	Full analytical data for 40Ar/39Ar analysis of the Sevier gravity slide pseudotachylyte
	Sample:	SGS Pseudotachylyte			Identifier:	UW169:C53
	Material:	Glass
															Corrected1										Blanks
	N	Power	Age	±1σ	K/Ca	±1σ	Cum. %39Ar	%40Ar*	40Ar*/39ArK	±1σ	39Ar/40Ar	±1σ	36Ar/40Ar	±1σ	40Ar	±1σ	39Ar	±1σ	38Ar	±1σ	37Ar	±1σ	36Ar	±1σ	40Ar	±1σ	39Ar	±1σ	38Ar	±1σ	37Ar	±1σ	36Ar	±1σ	RunDate	Δt3	J	±1σ	39Ar Decay	37Ar Decay	LambdaK	MonitorAge	MonitorName	MonitorMaterial	(40Ar/3939)K	±1σ	(38Ar/3939)K	±1σ	(37Ar/3939)K
		%	(Ma)	(Ma)			(%)	(%)							(Volts)		(Volts)		(Volts)		(Volts)		(Volts)		(Volts)		(Volts)		(Volts)		(Volts)		(Volts)			(days)
X	01A	1.6	24.4686	0.143467	0.401171	0.000482906	3.02679	22.3439	1.25041	0.00738069	0.178716	0.00010418	0.00260092	3.38331e-06	0.117585	4.5664e-05	0.0210044	9.11216e-06	0.000334663	8.12447e-07	0.00104278	1.16941e-06	0.000311896	3.79411e-07	4.13903e-05	5.00953e-06	6.15289e-07	5.01835e-07	3.20566e-07	2.83327e-07	6.15219e-07	2.03017e-07	3.83113e-07	1.68024e-08	2024-05-08 00:19:32	160.51	0.010764	5.76765e-06	1.0011	21.6542	5.464e-10	28.201	FC-2	sanidine	0.00073	9e-05	0.01215	3e-05	0.000224
X	01B	2	25.2041	0.104891	0.366803	0.000582468	8.38676	24.9683	1.28826	0.00539828	0.193842	0.000270822	0.002513	1.96856e-06	0.191979	4.49372e-05	0.037198	5.11795e-05	0.000591646	8.58202e-07	0.00201685	1.59205e-06	0.000494203	3.59938e-07	8.79864e-05	2.46689e-06	9.99215e-07	5.02324e-07	2.71649e-07	1.86009e-07	5.42204e-07	1.86411e-07	4.41922e-07	1.53368e-08	2024-05-08 01:57:49	160.578	0.010764	5.76765e-06	1.0011	21.6835	5.464e-10	28.201	FC-2	sanidine	0.00073	9e-05	0.01215	3e-05	0.000224
X	01C	2.5	24.9871	0.0916467	0.327124	0.000488219	14.5109	27.5802	1.27709	0.0047161	0.215995	0.000294909	0.00242549	1.87113e-06	0.196855	4.16462e-05	0.0425053	5.72617e-05	0.000663468	8.73719e-07	0.00258035	1.64678e-06	0.000492544	3.53176e-07	0.000106398	3.28414e-06	2.63896e-06	4.64528e-07	2.74538e-07	1.88892e-07	7.12761e-07	2.15321e-07	4.7803e-07	1.55106e-08	2024-05-08 03:36:11	160.647	0.010764	5.76765e-06	1.0011	21.7127	5.464e-10	28.201	FC-2	sanidine	0.00073	9e-05	0.01215	3e-05	0.000224
	01D	3.1	25.246	0.0876354	0.304627	0.000440648	22.3003	27.9079	1.29041	0.00451032	0.216305	0.000289082	0.00241451	1.66494e-06	0.250026	2.73897e-05	0.0540676	7.19191e-05	0.00084636	8.86483e-07	0.00351963	1.98424e-06	0.00062429	4.09428e-07	0.000111662	3.60214e-06	3.35251e-06	5.01018e-07	6.01796e-07	2.25252e-07	1.20725e-06	1.97771e-07	4.58376e-07	1.75656e-08	2024-05-08 05:14:38	160.715	0.010764	5.76765e-06	1.0011	21.7421	5.464e-10	28.201	FC-2	sanidine	0.00073	9e-05	0.01215	3e-05	0.000224
	01E	3.8	25.3567	0.0809481	0.299817	0.000245397	31.9145	28.1454	1.29611	0.0041664	0.217187	0.000127675	0.00240656	1.60624e-06	0.307345	3.30438e-05	0.0667346	3.84841e-05	0.00103548	8.70901e-07	0.00440818	2.5529e-06	0.000765475	4.85156e-07	0.000116279	5.54217e-06	2.90789e-06	3.9575e-07	3.93279e-07	1.87418e-07	9.41075e-07	1.78204e-07	4.47312e-07	1.70211e-08	2024-05-08 06:47:48	160.78	0.010764	5.76765e-06	1.0011	21.7699	5.464e-10	28.201	FC-2	sanidine	0.00073	9e-05	0.01215	3e-05	0.000224
	01F	4.6	25.2624	0.0860766	0.285175	0.000387741	39.3236	28.4185	1.29126	0.00443013	0.22012	0.000269259	0.0023974	1.72466e-06	0.233699	4.03497e-05	0.0514312	6.21913e-05	0.000800536	8.78535e-07	0.00356697	2.20337e-06	0.000581204	3.89572e-07	0.000112838	4.65668e-06	3.35747e-06	3.81981e-07	4.04384e-07	1.92891e-07	1.11391e-06	1.96946e-07	4.59868e-07	1.58431e-08	2024-05-08 08:20:59	160.844	0.010764	5.76765e-06	1.0011	21.7977	5.464e-10	28.201	FC-2	sanidine	0.00073	9e-05	0.01215	3e-05	0.000224
	01G	5.4	25.335	0.0961532	0.270173	0.000439854	44.0854	28.931	1.29499	0.00494895	0.223443	0.000333711	0.00238023	2.18428e-06	0.147961	5.91454e-05	0.033056	4.74973e-05	0.000513388	7.71443e-07	0.00241662	1.83855e-06	0.000366386	2.89787e-07	0.000104303	2.50366e-06	3.65257e-06	5.22762e-07	1.83081e-07	2.41868e-07	1.1297e-06	2.44987e-07	4.66911e-07	1.53827e-08	2024-05-08 09:54:20	160.909	0.010764	5.76765e-06	1.0011	21.8256	5.464e-10	28.201	FC-2	sanidine	0.00073	9e-05	0.01215	3e-05	0.000224
	01H	6.4	25.2046	0.102333	0.270587	0.000475584	47.6634	28.1007	1.28828	0.00526666	0.21816	0.000342076	0.00240805	2.41563e-06	0.113872	3.92101e-05	0.0248387	3.79415e-05	0.000387548	7.89266e-07	0.00181091	1.56581e-06	0.000284866	2.57592e-07	0.000101756	1.99862e-06	2.95311e-06	7.17871e-07	-2.21352e-07	2.84217e-07	5.09229e-07	2.70358e-07	4.42853e-07	1.67156e-08	2024-05-08 11:22:36	160.971	0.010764	5.76765e-06	1.00111	21.8521	5.464e-10	28.201	FC-2	sanidine	0.00073	9e-05	0.01215	3e-05	0.000224
	01I	7.8	25.1912	0.11017	0.266598	0.000454712	50.2754	27.5116	1.28759	0.00566991	0.213701	0.000323928	0.00242779	2.77416e-06	0.0848607	2.7263e-05	0.0181325	2.68215e-05	0.000285487	8.6693e-07	0.00134012	1.13176e-06	0.00021392	2.25432e-07	9.77055e-05	3.04357e-06	3.04671e-06	7.34373e-07	-9.17106e-08	1.54471e-07	2.14282e-07	1.57562e-07	4.36092e-07	1.72113e-08	2024-05-08 12:50:43	161.032	0.010764	5.76765e-06	1.00111	21.8785	5.464e-10	28.201	FC-2	sanidine	0.00073	9e-05	0.01215	3e-05	0.000224
	01J	10	25.1922	0.104676	0.265769	0.000477338	52.6212	27.6622	1.28765	0.00538718	0.214862	0.000331942	0.00242274	2.51707e-06	0.0758018	1.99385e-05	0.0162849	2.47551e-05	0.0002559	6.33103e-07	0.00120593	1.14807e-06	0.000190762	1.8408e-07	8.61025e-05	2.91011e-06	2.87187e-06	6.30714e-07	4.97832e-07	1.49698e-07	6.45019e-07	1.81976e-07	4.36616e-07	1.50084e-08	2024-05-08 14:14:09	161.09	0.010764	5.76765e-06	1.00111	21.9035	5.464e-10	28.201	FC-2	sanidine	0.00073	9e-05	0.01215	3e-05	0.000224
	01K	13	25.2397	0.147524	0.253614	0.000636442	53.4699	27.1052	1.29009	0.00759258	0.210136	0.000378816	0.00244141	4.34243e-06	0.0280407	1.02003e-05	0.00589197	1.03877e-05	9.23475e-05	7.60426e-07	0.000456709	8.13419e-07	7.11558e-05	1.18994e-07	7.23937e-05	2.57674e-06	1.03515e-06	6.13486e-07	6.16279e-07	2.04677e-07	9.06864e-07	2.01284e-07	4.01654e-07	1.48449e-08	2024-05-08 15:32:21	161.144	0.010764	5.76765e-06	1.00111	21.927	5.464e-10	28.201	FC-2	sanidine	0.00073	9e-05	0.01215	3e-05	0.000224
	01L	17	25.1182	0.123964	0.268071	0.000492208	54.9929	27.0871	1.28383	0.00637959	0.211018	0.000321401	0.00244201	3.33391e-06	0.0501106	2.22124e-05	0.0105729	1.53838e-05	0.000167021	7.37645e-07	0.000774568	8.64329e-07	0.000126949	1.57731e-07	6.80101e-05	2.37811e-06	-3.19718e-07	6.23583e-07	2.14358e-07	2.28832e-07	5.4913e-07	1.94076e-07	3.68722e-07	1.57758e-08	2024-05-08 16:50:36	161.198	0.010764	5.76765e-06	1.00111	21.9506	5.464e-10	28.201	FC-2	sanidine	0.00073	9e-05	0.01215	3e-05	0.000224
	01M	24	25.2567	0.10045	0.257399	0.000186475	60.8638	27.923	1.29096	0.00516988	0.21633	0.000100314	0.00241401	2.67573e-06	0.188424	5.60716e-05	0.0407581	1.44289e-05	0.000634092	9.92691e-07	0.00310791	1.95983e-06	0.000473239	4.84567e-07	6.80346e-05	2.72117e-06	-1.53881e-07	5.47748e-07	1.64175e-07	1.99548e-07	4.52877e-07	2.04611e-07	3.7176e-07	1.59692e-08	2024-05-08 17:29:34	161.225	0.010764	5.76765e-06	1.00111	21.9623	5.464e-10	28.201	FC-2	sanidine	0.00073	9e-05	0.01215	3e-05	0.000224
	01N	35	25.3011	0.0923663	0.258497	0.000135996	74.3637	28.0967	1.29325	0.00475395	0.217291	9.98947e-05	0.00240819	2.17273e-06	0.431358	0.000182174	0.0937211	1.67823e-05	0.00145655	1.19794e-06	0.00710852	3.50779e-06	0.00108088	8.25118e-07	6.21545e-05	2.82601e-06	-6.42098e-08	4.96163e-07	8.19435e-08	1.76149e-07	4.27489e-07	2.02469e-07	3.6229e-07	1.58878e-08	2024-05-08 18:48:01	161.28	0.010764	5.76765e-06	1.00111	21.986	5.464e-10	28.201	FC-2	sanidine	0.00073	9e-05	0.01215	3e-05	0.000224
	01O	45	25.1672	0.103374	0.247212	0.000129206	86.5126	28.2718	1.28636	0.00532011	0.219818	0.000160161	0.00240232	2.52347e-06	0.383725	0.000271271	0.0843457	1.46161e-05	0.00130972	1.24681e-06	0.0066855	3.288e-06	0.000961442	7.1304e-07	5.64863e-05	3.00404e-06	-1.33115e-07	4.55894e-07	4.98962e-08	1.48085e-07	4.93075e-07	2.00036e-07	3.50357e-07	1.64673e-08	2024-05-08 19:26:55	161.307	0.010764	5.76765e-06	1.00111	21.9977	5.464e-10	28.201	FC-2	sanidine	0.00073	9e-05	0.01215	3e-05	0.000224
	01P	55	25.34	0.099719	0.228939	0.000272082	98.6838	28.8025	1.29525	0.00513249	0.222407	0.000166735	0.00238454	2.46644e-06	0.379958	0.000242746	0.0845095	3.29877e-05	0.00131401	1.4385e-06	0.00722457	8.09473e-06	0.00094889	7.32221e-07	5.09734e-05	4.05973e-06	-2.0013e-07	5.86837e-07	1.87277e-08	1.82965e-07	5.56863e-07	2.64429e-07	3.38752e-07	2.20957e-08	2024-05-08 20:45:17	161.361	0.010764	5.76765e-06	1.00111	22.0214	5.464e-10	28.201	FC-2	sanidine	0.00073	9e-05	0.01215	3e-05	0.000224
	01Q	65	25.0975	0.123186	0.202566	0.000378086	100	28.3747	1.28277	0.00633949	0.221234	0.000342673	0.00239887	3.65426e-06	0.0413066	1.11904e-05	0.00914039	1.39132e-05	0.00014398	8.45299e-07	0.000857391	9.21429e-07	0.00010433	1.48182e-07	3.53055e-05	2.17964e-06	-2.21791e-07	4.70998e-07	-2.23895e-07	3.30623e-07	4.71728e-08	3.50442e-07	3.60081e-07	2.02013e-08	2024-05-10 08:29:22	162.85	0.010764	5.76765e-06	1.00112	22.6786	5.464e-10	28.201	FC-2	sanidine	0.00073	9e-05	0.01215	3e-05	0.000224
Integrated K/Ca ±2σ					0.262272	0.000174932	SD
Plateau Age ±2σ			25.2507	0.0537899	n=14/17	MSWD=0.597	steps D-Q
Total Integrated Age ±2σ			25.2223	0.0559129
Isochron Age ±2σ			26.5863	1.87687		MSWD=1.060
(40Ar/36Ar)trapped ±2σ			292.396	8.74236
Notes:
1Corrected: Isotopic intensities corrected for blank, baseline, radioactivity decay and detector intercalibration, not for interfering reactions.
3Time interval (days) between end of irradiation and beginning of analysis.
X symbol preceding sample ID denotes analyses excluded from plateau age calculations.
Errors quoted for individual analyses include analytical error only, without interfering reactions or J uncertainties.
Integrated age calculated by summing isotopic measurements of all steps.
Plateau age is inverse-variance-weighted mean of selected steps.
Plateau age error is inverse-variance-weighted mean error (Taylor, 1982) times root MSWD where MSWD>1.
Decay constants and isotopic abundances after Min et al. (2000)
Ages calculated relative to 28.201 Ma Fish Canyon sanidine standard (Kuiper et al., 2008).
[truncated: 9 more columns]

## Sheet: S4
Table S4.	Full analytical data for 40Ar/39Ar analyses of the Antimony Tuff
		Antimony Tuff
	Sample:	PH030218-1			Identifier:	UW145:C44
	Material:	Feldspar
														Corrected1
	N	Power	Age	±1σ	K/Ca	±1σ	%40Ar*	40Ar*/39ArK	±1σ	39Ar/40Ar	±1σ	36Ar/40Ar	±1σ	40Ar	±1σ	39Ar	±1σ	38Ar	±1σ	37Ar	±1σ	36Ar	±1σ	J	±1σ	39Ar Decay	37Ar Decay	LambdaK	MonitorAge	MonitorName	MonitorMaterial	(40Ar/3939)K	±1σ	(38Ar/3939)K	±1σ	(37Ar/3939)K	±1σ	(39Ar/3737)Ca	±1σ	(38Ar/3737)Ca	±1σ	(36Ar/3737)Ca	±1σ	(36Ar/3838)Cl	Ca/K
		%	(Ma)	(Ma)			(%)							(cps)		(cps)		(cps)		(cps)		(cps)
	01B	18	25.1771	0.0642165	11.0918	0.173983	94.577	0.828377	0.00212742	1.14242	0.00103272	0.000179685	7.56751e-06	227032	180.342	258899	103.438	3133.57	9.49134	343.843	5.39157	43.4875	1.71605	0.0167217	9.25372e-06	1.00121	29.2951	5.464e-10	28.201	FC-2	sanidine	0.00054	0.00014	0.0121	2e-05	0	0	0.000702	1.2e-05	1.96e-05	8e-07	0.0002702	4e-07	263	2.32
	01C	18	25.2052	0.0653232	12.0998	0.195844	93.192	0.829308	0.00216411	1.12441	0.00102569	0.000226133	7.56868e-06	246903	200.331	277123	106.612	3359.02	11.308	337.294	5.45765	58.4668	1.8664	0.0167217	9.25372e-06	1.00121	29.3031	5.464e-10	28.201	FC-2	sanidine	0.00054	0.00014	0.0121	2e-05	0	0	0.000702	1.2e-05	1.96e-05	8e-07	0.0002702	4e-07	263	2.32
	01E	18	25.1547	0.113067	12.0587	0.18282	74.7719	0.827635	0.00374575	0.903881	0.000841056	0.000843771	1.09307e-05	313898	257.251	283252	119.278	3464.23	12.246	345.699	5.23895	267.463	3.42197	0.0167217	9.25372e-06	1.00121	29.3226	5.464e-10	28.201	FC-2	sanidine	0.00054	0.00014	0.0121	2e-05	0	0	0.000702	1.2e-05	1.96e-05	8e-07	0.0002702	4e-07	263	2.32
	01J	18	25.2541	0.131735	10.2184	0.179266	79.226	0.830929	0.00436441	0.953954	0.000922169	0.000694441	1.35856e-05	218844	187.801	208412	88.2393	2536.09	8.92618	299.65	5.25522	154.268	2.96819	0.0167217	9.25372e-06	1.00121	29.3734	5.464e-10	28.201	FC-2	sanidine	0.00054	0.00014	0.0121	2e-05	0	0	0.000702	1.2e-05	1.96e-05	8e-07	0.0002702	4e-07	263	2.32
	01K	18	25.0168	0.0743572	11.0463	0.131704	88.9584	0.823066	0.00246315	1.08145	0.000984569	0.000368088	8.40502e-06	351886	279.91	379874	157.652	4631.78	13.8884	505.098	6.0184	133.461	2.95345	0.0167217	9.25372e-06	1.00121	29.3814	5.464e-10	28.201	FC-2	sanidine	0.00054	0.00014	0.0121	2e-05	0	0	0.000702	1.2e-05	1.96e-05	8e-07	0.0002702	4e-07	263	2.32
	01N	18	25.0587	0.0805073	9.20166	0.102043	89.4386	0.824454	0.00266694	1.08546	0.000993438	0.00035199	9.21397e-06	331105	269.885	358766	138.572	4361.61	11.353	572.054	6.33981	121.022	3.04687	0.0167217	9.25372e-06	1.00121	29.4126	5.464e-10	28.201	FC-2	sanidine	0.00054	0.00014	0.0121	2e-05	0	0	0.000702	1.2e-05	1.96e-05	8e-07	0.0002702	4e-07	263	2.32
	01P	18	25.255	0.0741063	10.9313	0.175799	92.3114	0.830957	0.00245516	1.11157	0.00111637	0.000255667	8.51686e-06	249717	221.747	277083	122.263	3343.61	10.4836	371.657	5.97463	66.7539	2.12409	0.0167217	9.25372e-06	1.00121	29.4321	5.464e-10	28.201	FC-2	sanidine	0.00054	0.00014	0.0121	2e-05	0	0	0.000702	1.2e-05	1.96e-05	8e-07	0.0002702	4e-07	263	2.32
	01R	18	25.0368	0.0827416	12.0117	0.232336	92.8401	0.823729	0.00274092	1.12776	0.00113343	0.00023792	9.80567e-06	207965	183.757	234113	105.533	2829.69	9.83762	285.588	5.52235	51.7166	2.03691	0.0167217	9.25372e-06	1.00121	29.4517	5.464e-10	28.201	FC-2	sanidine	0.00054	0.00014	0.0121	2e-05	0	0	0.000702	1.2e-05	1.96e-05	8e-07	0.0002702	4e-07	263	2.32
	01T	18	25.1588	0.0731992	11.2244	0.171184	90.9669	0.827769	0.00242498	1.09959	0.00102824	0.000300747	8.38287e-06	257553	209.915	282700	121.733	3427.56	10.1002	368.801	5.62222	80.3454	2.1562	0.0167217	9.25372e-06	1.00121	29.4712	5.464e-10	28.201	FC-2	sanidine	0.00054	0.00014	0.0121	2e-05	0	0	0.000702	1.2e-05	1.96e-05	8e-07	0.0002702	4e-07	263	2.32
	01U	18	25.2482	0.0687535	9.85966	0.14296	93.2133	0.830732	0.00227781	1.12274	0.00111934	0.000225423	7.90356e-06	250816	222.602	281099	119.387	3415.39	10.6806	417.356	6.04868	59.8296	1.97977	0.0167217	9.25372e-06	1.00122	29.4793	5.464e-10	28.201	FC-2	sanidine	0.00054	0.00014	0.0121	2e-05	0	0	0.000702	1.2e-05	1.96e-05	8e-07	0.0002702	4e-07	263	2.32
	01Y	18	25.0538	0.0745245	10.798	0.146526	88.0299	0.824293	0.00246874	1.06856	0.000961593	0.000399227	8.32387e-06	378020	302.148	403226	154.942	4918.12	14.8502	545.934	7.405	155.185	3.14163	0.0167217	9.25372e-06	1.00122	29.5184	5.464e-10	28.201	FC-2	sanidine	0.00054	0.00014	0.0121	2e-05	0	0	0.000702	1.2e-05	1.96e-05	8e-07	0.0002702	4e-07	263	2.32
	01Z	18	25.2081	0.0816858	9.51208	0.145488	89.967	0.829404	0.0027062	1.08535	0.00122048	0.00033428	9.10969e-06	292147	300.04	316523	136.208	3846.72	13.844	486.284	7.4346	101.48	2.65705	0.0167217	9.25372e-06	1.00122	29.5301	5.464e-10	28.201	FC-2	sanidine	0.00054	0.00014	0.0121	2e-05	0	0	0.000702	1.2e-05	1.96e-05	8e-07	0.0002702	4e-07	263	2.32
	01AA	18	25.0345	0.0831413	11.5444	0.481424	95.6078	0.823654	0.00275416	1.1615	0.0013347	0.000145104	1.00074e-05	220697	233.557	255875	106.257	3093.55	9.46818	323.82	13.5029	34.5843	2.20417	0.0167217	9.25372e-06	1.00122	29.5381	5.464e-10	28.201	FC-2	sanidine	0.00054	0.00014	0.0121	2e-05	0	0	0.000702	1.2e-05	1.96e-05	8e-07	0.0002702	4e-07	263	2.32
Integrated K/Ca ±2σ					10.7572	0.102868
Weighted Mean Age ±2σ			25.1441	0.057	n=13/13	MSWD=1.331
Notes:
1Corrected: Isotopic intensities corrected for blank, baseline, radioactivity decay and detector intercalibration, not for interfering reactions.
X symbol preceding sample ID denotes analyses excluded from weighted-mean age calculations.
Errors quoted for individual analyses include analytical error only, without interfering reactions or J uncertainties.
Decay constants and isotopic abundances after Min et al. (2000)
Ages calculated relative to 28.201 Ma Fish Canyon sanidine standard (Kuiper et al., 2008)
		Antimony Tuff
	Sample:	MP071020-2			Identifier:	UW156:C71
	Material:	Sanidine
															Corrected1
	N	Power	Age	±1σ	K/Ca	±1σ	Cum. %39Ar	%40Ar*	40Ar*/39ArK	±1σ	39Ar/40Ar	±1σ	36Ar/40Ar	±1σ	40Ar	±1σ	39Ar	±1σ	38Ar	±1σ	37Ar	±1σ	36Ar	±1σ	J	±1σ	39Ar Decay	37Ar Decay	LambdaK	MonitorAge	MonitorName	MonitorMaterial	(40Ar/3939)K	±1σ	(38Ar/3939)K	±1σ	(37Ar/3939)K	±1σ	(39Ar/3737)Ca	±1σ	(38Ar/3737)Ca	±1σ	(36Ar/3737)Ca	±1σ	(36Ar/3838)Cl	Ca/K
		%	(Ma)	(Ma)			(%)	(%)							(cps)		(cps)		(cps)		(cps)		(cps)
	01A	25	25.1354	0.0294268	12.1553	0.448663	4.90887	98.128	1.04679	0.00123394	0.93806	0.000929668	6.04496e-05	2.00438e-06	442036	431.577	413751	59.2202	4990.39	35.874	207.609	7.61415	30.6548	0.872604	0.0132106	5.5014e-06	1.00153	71.2242	5.464e-10	28.201	FC-2	sanidine	0.00073	9e-05	0.01215	3e-05	0.000224	1.6e-05	0.000702	1.2e-05	1.96e-05	8e-07	0.0002702	4e-07	263	2.32
	03A	25	25.1801	0.0247976	9.91423	0.389312	10.3671	97.302	1.04866	0.00103985	0.928497	0.000670998	8.81586e-05	2.14553e-06	496562	348.494	460054	68.2786	5477.52	32.3614	282.279	11.0268	49.1117	1.0426	0.0132106	5.5014e-06	1.00153	71.329	5.464e-10	28.201	FC-2	sanidine	0.00073	9e-05	0.01215	3e-05	0.000224	1.6e-05	0.000702	1.2e-05	1.96e-05	8e-07	0.0002702	4e-07	263	2.32
	04A	25	25.2301	0.0378868	11.7088	0.67623	12.6596	96.7853	1.05076	0.00158878	0.921718	0.00067904	0.000105492	4.24015e-06	210093	149.081	193225	34.355	2325.35	21.9159	100.451	5.76599	24.062	0.883009	0.0132106	5.5014e-06	1.00153	71.3507	5.464e-10	28.201	FC-2	sanidine	0.00073	9e-05	0.01215	3e-05	0.000224	1.6e-05	0.000702	1.2e-05	1.96e-05	8e-07	0.0002702	4e-07	263	2.32
	05A	25	25.2281	0.0244077	10.4188	0.428411	17.1724	98.1465	1.05068	0.00102353	0.934763	0.000685565	5.98391e-05	2.05862e-06	407806	290.562	380372	56.9645	4558.32	35.1223	221.912	9.07494	28.6169	0.82009	0.0132106	5.5014e-06	1.00153	71.4031	5.464e-10	28.201	FC-2	sanidine	0.00073	9e-05	0.01215	3e-05	0.000224	1.6e-05	0.000702	1.2e-05	1.96e-05	8e-07	0.0002702	4e-07	263	2.32
	07A	25	25.2189	0.0319827	11.9747	0.547675	19.7044	97.3662	1.05029	0.00134118	0.927667	0.000692315	8.60098e-05	3.33533e-06	230561	166.781	213418	34.3959	2552.71	19.4158	108.306	4.92247	21.8782	0.762338	0.0132106	5.5014e-06	1.00153	71.4775	5.464e-10	28.201	FC-2	sanidine	0.00073	9e-05	0.01215	3e-05	0.000224	1.6e-05	0.000702	1.2e-05	1.96e-05	8e-07	0.0002702	4e-07	263	2.32
	08A	25	25.2341	0.027556	10.7892	0.596893	24.361	97.5246	1.05093	0.00115556	0.928614	0.000684786	8.06962e-05	2.61131e-06	423581	303.817	392487	57.7186	4744.78	35.4195	220.864	12.15	38.3874	1.07968	0.0132106	5.5014e-06	1.00153	71.4992	5.464e-10	28.201	FC-2	sanidine	0.00073	9e-05	0.01215	3e-05	0.000224	1.6e-05	0.000702	1.2e-05	1.96e-05	8e-07	0.0002702	4e-07	263	2.32
	09A	25	25.1547	0.036328	9.23471	0.406946	26.1509	98.9921	1.0476	0.00152334	0.945597	0.000723371	3.14704e-05	4.08819e-06	159890	117.855	150861	27.754	1776.31	16.8137	99.0318	4.34288	6.9116	0.647697	0.0132106	5.5014e-06	1.00153	71.5518	5.464e-10	28.201	FC-2	sanidine	0.00073	9e-05	0.01215	3e-05	0.000224	1.6e-05	0.000702	1.2e-05	1.96e-05	8e-07	0.0002702	4e-07	263	2.32
	10A	25	25.2299	0.0223548	11.7029	0.437935	30.7566	99.0317	1.05075	0.000937443	0.943133	0.000700156	3.01481e-05	1.60863e-06	412506	297.935	388197	56.9327	4629.39	27.6893	201.282	7.48591	16.2612	0.646887	0.0132106	5.5014e-06	1.00153	71.5736	5.464e-10	28.201	FC-2	sanidine	0.00073	9e-05	0.01215	3e-05	0.000224	1.6e-05	0.000702	1.2e-05	1.96e-05	8e-07	0.0002702	4e-07	263	2.32
	11A	25	25.1899	0.0263105	9.51068	0.342887	34.234	98.5752	1.04908	0.0011033	0.940284	0.000718367	4.54549e-05	2.35124e-06	312394	231.867	293098	46.1821	3473.11	18.7669	186.652	6.69565	17.7493	0.722292	0.0132106	5.5014e-06	1.00153	71.6262	5.464e-10	28.201	FC-2	sanidine	0.00073	9e-05	0.01215	3e-05	0.000224	1.6e-05	0.000702	1.2e-05	1.96e-05	8e-07	0.0002702	4e-07	263	2.32
	12A	25	25.1485	0.028724	13.8781	0.567374	37.1292	98.13	1.04734	0.00120448	0.937586	0.000720286	6.03858e-05	2.77364e-06	260844	194.156	244028	41.0003	2892.94	26.6147	106.707	4.33075	17.7623	0.717889	0.0132106	5.5014e-06	1.00153	71.648	5.464e-10	28.201	FC-2	sanidine	0.00073	9e-05	0.01215	3e-05	0.000224	1.6e-05	0.000702	1.2e-05	1.96e-05	8e-07	0.0002702	4e-07	263	2.32
	13A	25	25.1644	0.0302583	8.84148	0.309894	42.1542	95.1955	1.04801	0.00126883	0.908951	0.000673081	0.000158807	2.96173e-06	466973	337.578	423540	57.3511	5138.52	28.5729	289.733	10.1078	79.6861	1.36695	0.0132106	5.5014e-06	1.00153	71.7007	5.464e-10	28.201	FC-2	sanidine	0.00073	9e-05	0.01215	3e-05	0.000224	1.6e-05	0.000702	1.2e-05	1.96e-05	8e-07	0.0002702	4e-07	263	2.32
	14A	25	25.2195	0.0231212	10.4053	0.35926	47.7571	98.0881	1.05032	0.000969579	0.934529	0.000695756	6.17963e-05	1.73065e-06	506437	367.865	472248	64.8044	5662.33	33.0887	274.64	9.43043	36.5351	0.856082	0.0132106	5.5014e-06	1.00153	71.7225	5.464e-10	28.201	FC-2	sanidine	0.00073	9e-05	0.01215	3e-05	0.000224	1.6e-05	0.000702	1.2e-05	1.96e-05	8e-07	0.0002702	4e-07	263	2.32
	15A	25	25.1554	0.0401213	10.3849	0.365723	52.6428	94.8315	1.04763	0.00168241	0.9058	0.00088515	0.000171013	3.91892e-06	455611	438.239	411801	60.8385	4954.65	35.4908	239.779	8.39811	82.4628	1.77509	0.0132106	5.5014e-06	1.00153	71.7755	5.464e-10	28.201	FC-2	sanidine	0.00073	9e-05	0.01215	3e-05	0.000224	1.6e-05	0.000702	1.2e-05	1.96e-05	8e-07	0.0002702	4e-07	263	2.32
	16A	25	25.2202	0.028212	15.1482	0.656833	55.2767	98.5692	1.05034	0.00118306	0.93909	0.000680862	4.56598e-05	2.82054e-06	236924	165.429	222005	38.6259	2660.92	17.7823	88.8107	3.82036	12.5043	0.663538	0.0132106	5.5014e-06	1.00153	71.7974	5.464e-10	28.201	FC-2	sanidine	0.00073	9e-05	0.01215	3e-05	0.000224	1.6e-05	0.000702	1.2e-05	1.96e-05	8e-07	0.0002702	4e-07	263	2.32
	17A	25	25.1558	0.0237507	11.0912	0.378951	59.3124	98.2211	1.04764	0.00099594	0.938185	0.000679224	5.73307e-05	1.9793e-06	363359	255.86	340153	48.6679	4061.51	31.4249	185.322	6.29486	24.3645	0.707907	0.0132106	5.5014e-06	1.00153	71.8502	5.464e-10	28.201	FC-2	sanidine	0.00073	9e-05	0.01215	3e-05	0.000224	1.6e-05	0.000702	1.2e-05	1.96e-05	8e-07	0.0002702	4e-07	263	2.32
	18A	25	25.1675	0.0257176	11.032	0.374378	63.7216	97.0005	1.04813	0.00107843	0.926084	0.000672873	9.82708e-05	2.29673e-06	402169	283.135	371632	58.3121	4453.28	33.7481	203.492	6.86549	43.3959	0.912762	0.0132106	5.5014e-06	1.00153	71.872	5.464e-10	28.201	FC-2	sanidine	0.00073	9e-05	0.01215	3e-05	0.000224	1.6e-05	0.000702	1.2e-05	1.96e-05	8e-07	0.0002702	4e-07	263	2.32
	19A	25	25.1458	0.0225774	11.9801	0.548425	68.2405	99.1289	1.04723	0.000946734	0.94724	0.000715403	2.68825e-05	1.61951e-06	402979	296.225	380881	56.496	4516.88	23.9005	192.004	8.73444	14.4898	0.629503	0.0132106	5.5014e-06	1.00153	71.9248	5.464e-10	28.201	FC-2	sanidine	0.00073	9e-05	0.01215	3e-05	0.000224	1.6e-05	0.000702	1.2e-05	1.96e-05	8e-07	0.0002702	4e-07	263	2.32
	20A	25	25.1403	0.0284648	9.18336	0.313062	71.3277	97.7116	1.04699	0.00119361	0.933894	0.000701805	7.44157e-05	2.759e-06	279243	202.811	260215	44.618	3078.19	28.8941	170.825	5.79523	24.037	0.761316	0.0132106	5.5014e-06	1.00153	71.9467	5.464e-10	28.201	FC-2	sanidine	0.00073	9e-05	0.01215	3e-05	0.000224	1.6e-05	0.000702	1.2e-05	1.96e-05	8e-07	0.0002702	4e-07	263	2.32
	21A	25	25.1563	0.0255739	9.93933	0.343681	74.8569	98.0039	1.04767	0.00107239	0.93609	0.000716798	6.46141e-05	2.17518e-06	318466	237.524	297463	44.3061	3552.64	28.9642	180.363	6.20393	24.028	0.68131	0.0132106	5.5014e-06	1.00153	71.9996	5.464e-10	28.201	FC-2	sanidine	0.00073	9e-05	0.01215	3e-05	0.000224	1.6e-05	0.000702	1.2e-05	1.96e-05	8e-07	0.0002702	4e-07	263	2.32
	22A	25	25.2201	0.0247016	11.5987	0.405558	78.627	98.341	1.05034	0.00103585	0.936918	0.000720626	5.33133e-05	1.98374e-06	339900	253.635	317762	52.0694	3832.56	26.071	165.199	5.74106	21.2905	0.664201	0.0132106	5.5014e-06	1.00153	72.0215	5.464e-10	28.201	FC-2	sanidine	0.00073	9e-05	0.01215	3e-05	0.000224	1.6e-05	0.000702	1.2e-05	1.96e-05	8e-07	0.0002702	4e-07	263	2.32
	23A	25	25.2086	0.0275246	12.6034	0.470097	81.5833	97.747	1.04986	0.00115423	0.931684	0.000708725	7.32348e-05	2.54725e-06	268037	198.059	249181	39.2715	2927.98	22.9713	119.192	4.41632	21.8827	0.676579	0.0132106	5.5014e-06	1.00153	72.0743	5.464e-10	28.201	FC-2	sanidine	0.00073	9e-05	0.01215	3e-05	0.000224	1.6e-05	0.000702	1.2e-05	1.96e-05	8e-07	0.0002702	4e-07	263	2.32
	24A	25	25.2223	0.0358366	11.6332	0.464276	83.5952	95.8775	1.05043	0.00150279	0.91335	0.000707586	0.000135937	3.79751e-06	186067	138.867	169576	32.0081	2011.96	18.776	87.8087	3.48303	26.9562	0.702508	0.0132106	5.5014e-06	1.00153	72.0962	5.464e-10	28.201	FC-2	sanidine	0.00073	9e-05	0.01215	3e-05	0.000224	1.6e-05	0.000702	1.2e-05	1.96e-05	8e-07	0.0002702	4e-07	263	2.32
	29A	25	25.1882	0.0225099	11.8394	0.448079	88.1263	98.668	1.049	0.000943927	0.941233	0.000649844	4.23432e-05	1.87391e-06	406645	269.968	381909	64.0238	4576.28	29.9577	193.787	7.28851	20.942	0.747805	0.0132106	5.5014e-06	1.00153	72.2996	5.464e-10	28.201	FC-2	sanidine	0.00073	9e-05	0.01215	3e-05	0.000224	1.6e-05	0.000702	1.2e-05	1.96e-05	8e-07	0.0002702	4e-07	263	2.32
	30A	25	25.2281	0.0303688	10.0162	0.410586	90.5685	98.2655	1.05068	0.00127351	0.935899	0.000653806	5.58478e-05	3.2352e-06	220420	147.885	205840	35.727	2462.08	20.3593	123.304	5.02794	14.682	0.705658	0.0132106	5.5014e-06	1.00153	72.3217	5.464e-10	28.201	FC-2	sanidine	0.00073	9e-05	0.01215	3e-05	0.000224	1.6e-05	0.000702	1.2e-05	1.96e-05	8e-07	0.0002702	4e-07	263	2.32
	31A	25	25.2081	0.0232716	12.9132	0.486758	94.2726	98.8359	1.04984	0.00097588	0.942087	0.000692179	3.67142e-05	1.85166e-06	332127	236.783	312206	47.9996	3707.8	29.7673	145.176	5.43526	14.971	0.605071	0.0132106	5.5014e-06	1.00153	72.3748	5.464e-10	28.201	FC-2	sanidine	0.00073	9e-05	0.01215	3e-05	0.000224	1.6e-05	0.000702	1.2e-05	1.96e-05	8e-07	0.0002702	4e-07	263	2.32
	34A	25	25.1773	0.0296946	12.3307	0.533337	96.6528	99.2194	1.04855	0.0012452	0.94691	0.000699251	2.38498e-05	3.07898e-06	212331	151.058	200617	35.4261	2352.72	19.401	97.5326	4.19132	6.92532	0.648029	0.0132106	5.5014e-06	1.00153	72.472	5.464e-10	28.201	FC-2	sanidine	0.00073	9e-05	0.01215	3e-05	0.000224	1.6e-05	0.000702	1.2e-05	1.96e-05	8e-07	0.0002702	4e-07	263	2.32
	35A	25	25.2039	0.0283309	9.62374	0.358014	100	96.7094	1.04966	0.00118803	0.921959	0.000672704	0.000108035	2.73763e-06	306669	216.558	282121	45.5968	3416.51	29.4075	175.437	6.4934	36.5196	0.828797	0.0132106	5.5014e-06	1.00153	72.4941	5.464e-10	28.201	FC-2	sanidine	0.00073	9e-05	0.01215	3e-05	0.000224	1.6e-05	0.000702	1.2e-05	1.96e-05	8e-07	0.0002702	4e-07	263	2.32
Weighted mean K/Ca ±2σ					10.7248	0.525915	SEM, but if MSWD>1 use SEM * sqrt(MSWD)
Weighted mean Age ±2σ			25.1907	0.0244632	n=27/27	MSWD=1.454
Isochron Age ±2σ			25.19	0.0309448		MSWD=1.512		25.2341
(40Ar/36Ar)trapped ±2σ			299.01	12.1077
Notes:
1Corrected: Isotopic intensities corrected for blank, baseline, radioactivity decay and detector intercalibration, not for interfering reactions.
X symbol preceding sample ID denotes analyses excluded from weighted-mean age calculations.
pX symbol preceding sample ID denotes analyses excluded plateau age calculations.
Errors quoted for individual analyses include analytical error only, without interfering reactions or J uncertainties.
Integrated age calculated by summing isotopic measurements of all steps.
Plateau age is inverse-variance-weighted mean of selected steps.
Plateau age error is inverse-variance-weighted mean error (Taylor, 1982) times root MSWD where MSWD>1.
Decay constants and isotopic abundances after Min et al. (2000)
Ages calculated relative to 28.201 Ma Fish Canyon sanidine standard (Kuiper et al., 2008)

## Sheet: S5
Table S5.	Full analytical data for 40Ar/39Ar analysis of the Langdon Mountain lava flow
		Langdon Mountain Lava Flow
	Sample:	MP070920-3			Identifier:	UW156:C70
	Material:	Plagioclase
															Corrected1
	N	Power	Age	±1σ	K/Ca	±1σ	Cum. %39Ar	%40Ar*	40Ar*/39ArK	±1σ	39Ar/40Ar	±1σ	36Ar/40Ar	±1σ	40Ar	±1σ	39Ar	±1σ	38Ar	±1σ	37Ar	±1σ	36Ar	±1σ	J	±1σ	39Ar Decay	37Ar Decay	LambdaK	MonitorAge	MonitorName	MonitorMaterial	(40Ar/3939)K	±1σ	(38Ar/3939)K	±1σ	(37Ar/3939)K	±1σ	(39Ar/3737)Ca	±1σ	(38Ar/3737)Ca	±1σ	(36Ar/3737)Ca	±1σ	(36Ar/3838)Cl	Ca/K
		%	(Ma)	(Ma)			(%)	(%)							(cps)		(cps)		(cps)		(cps)		(cps)
	01A	0.4	27.5465	2.14039	0.0774839	0.00352959	0.605082	27.0448	1.14796	0.0898704	0.23563	0.000343874	0.00244341	7.07918e-05	27619.7	31.9423	6522.86	5.64668	98.9596	4.39094	631.945	28.6683	77.2574	1.9021	0.0132106	5.5014e-06	1.00145	57.2815	5.464e-10	28.201	FC-2	sanidine	0.00073	9e-05	0.01215	3e-05	0.000224	1.6e-05	0.000702	1.2e-05	1.96e-05	8e-07	0.0002702	4e-07	263	2.32
	01B	0.5	24.977	0.588816	0.0782329	0.0024801	3.47674	60.772	1.04015	0.0246885	0.584512	0.000520869	0.00131304	4.81039e-05	52854.9	42.0584	30955.7	11.4622	374.803	7.1608	2967.3	93.695	115.338	2.08399	0.0132106	5.5014e-06	1.00145	57.342	5.464e-10	28.201	FC-2	sanidine	0.00073	9e-05	0.01215	3e-05	0.000224	1.6e-05	0.000702	1.2e-05	1.96e-05	8e-07	0.0002702	4e-07	263	2.32
	01C	0.65	24.6618	0.435223	0.0770049	0.00252134	11.9453	86.0888	1.02693	0.0182453	0.838823	0.000651479	0.000464177	5.08963e-05	108633	78.8593	91293.8	20.1032	1088.79	16.1627	8880.69	289.62	188.117	3.21057	0.0132106	5.5014e-06	1.00145	57.4027	5.464e-10	28.201	FC-2	sanidine	0.00073	9e-05	0.01215	3e-05	0.000224	1.6e-05	0.000702	1.2e-05	1.96e-05	8e-07	0.0002702	4e-07	263	2.32
	01D	0.8	24.1157	0.429494	0.0773049	0.00257376	24.0968	89.488	1.00404	0.0179998	0.891857	0.000669208	0.000350138	5.33866e-05	146616	102.739	130997	27.2188	1603.1	17.6939	12681.1	420.526	248.172	4.29743	0.0132106	5.5014e-06	1.00145	57.4594	5.464e-10	28.201	FC-2	sanidine	0.00073	9e-05	0.01215	3e-05	0.000224	1.6e-05	0.000702	1.2e-05	1.96e-05	8e-07	0.0002702	4e-07	263	2.32
	01E	1	25.2677	0.487456	0.070161	0.00254157	36.7218	95.6778	1.05234	0.0204418	0.909796	0.000714854	0.000142639	6.17982e-05	149326	109.866	136154	26.7376	1601.42	22.7608	14502.2	523.056	246.63	4.34131	0.0132106	5.5014e-06	1.00145	57.5162	5.464e-10	28.201	FC-2	sanidine	0.00073	9e-05	0.01215	3e-05	0.000224	1.6e-05	0.000702	1.2e-05	1.96e-05	8e-07	0.0002702	4e-07	263	2.32
	01F	1.25	25.3902	0.5099	0.0685759	0.00248447	46.8649	91.3461	1.05747	0.0213844	0.86436	0.00068666	0.000287923	6.14348e-05	126273	93.3782	109399	23.4578	1324.29	13.3433	11915.5	429.771	221.576	3.92092	0.0132106	5.5014e-06	1.00145	57.5409	5.464e-10	28.201	FC-2	sanidine	0.00073	9e-05	0.01215	3e-05	0.000224	1.6e-05	0.000702	1.2e-05	1.96e-05	8e-07	0.0002702	4e-07	263	2.32
	01G	1.5	24.6774	0.736225	0.0771421	0.00253975	60.6295	49.2163	1.02758	0.0308641	0.479118	0.000354321	0.00170038	4.93534e-05	309052	216.207	148386	27.336	1886.72	19.3322	14360	470.9	748.788	13.3605	0.0132106	5.5014e-06	1.00145	57.5978	5.464e-10	28.201	FC-2	sanidine	0.00073	9e-05	0.01215	3e-05	0.000224	1.6e-05	0.000702	1.2e-05	1.96e-05	8e-07	0.0002702	4e-07	263	2.32
	01H	1.7	24.7509	0.792777	0.0668064	0.00220072	74.8321	49.024	1.03067	0.0332362	0.475818	0.000354842	0.00170683	5.27735e-05	321099	224.281	153201	29.7279	1975.8	19.7653	17102	560.798	814.131	14.5043	0.0132106	5.5014e-06	1.00145	57.6225	5.464e-10	28.201	FC-2	sanidine	0.00073	9e-05	0.01215	3e-05	0.000224	1.6e-05	0.000702	1.2e-05	1.96e-05	8e-07	0.0002702	4e-07	263	2.32
	01I	1.85	24.1102	0.621473	0.0605817	0.00195325	80.3079	66.447	1.00381	0.0260454	0.662267	0.00053811	0.00112275	5.7457e-05	88957.8	65.7005	59093.6	16.3779	720.671	10.75	7263.91	233.019	213.026	3.5881	0.0132106	5.5014e-06	1.00145	57.6795	5.464e-10	28.201	FC-2	sanidine	0.00073	9e-05	0.01215	3e-05	0.000224	1.6e-05	0.000702	1.2e-05	1.96e-05	8e-07	0.0002702	4e-07	263	2.32
	01J	2	23.8037	0.761495	0.0588432	0.0018979	83.8417	52.0706	0.990967	0.0319083	0.525654	0.000449193	0.00160468	5.59344e-05	72322.5	54.1778	38142	13.7513	469.334	8.8519	4824.43	154.794	191.219	3.24123	0.0132106	5.5014e-06	1.00145	57.7019	5.464e-10	28.201	FC-2	sanidine	0.00073	9e-05	0.01215	3e-05	0.000224	1.6e-05	0.000702	1.2e-05	1.96e-05	8e-07	0.0002702	4e-07	263	2.32
	01K	2.2	24.2009	0.663711	0.0642813	0.00207154	96.1561	56.455	1.00761	0.0278169	0.560515	0.000425274	0.00145773	5.19762e-05	236354	167.756	132856	26.3142	1630.65	19.5434	15374.9	493.126	584.308	9.55848	0.0132106	5.5014e-06	1.00145	57.7565	5.464e-10	28.201	FC-2	sanidine	0.00073	9e-05	0.01215	3e-05	0.000224	1.6e-05	0.000702	1.2e-05	1.96e-05	8e-07	0.0002702	4e-07	263	2.32
	01L	2.4	24.8625	0.721765	0.067979	0.00219507	97.3638	62.0609	1.03534	0.030261	0.599685	0.000688474	0.00126983	6.05171e-05	21667.3	21.1105	13026.8	7.54501	165.654	5.42394	1425.34	45.8115	49.7536	1.09741	0.0132106	5.5014e-06	1.00145	57.7794	5.464e-10	28.201	FC-2	sanidine	0.00073	9e-05	0.01215	3e-05	0.000224	1.6e-05	0.000702	1.2e-05	1.96e-05	8e-07	0.0002702	4e-07	263	2.32
	01M	3	24.6998	0.741447	0.0601836	0.0019209	98.5746	61.0279	1.02853	0.0310834	0.59361	0.000695824	0.00130445	6.15029e-05	21943.2	22.0397	13066.5	7.44936	167.565	6.1496	1612.41	51.1963	53.8082	1.08502	0.0132106	5.5014e-06	1.00145	57.8342	5.464e-10	28.201	FC-2	sanidine	0.00073	9e-05	0.01215	3e-05	0.000224	1.6e-05	0.000702	1.2e-05	1.96e-05	8e-07	0.0002702	4e-07	263	2.32
	01N	4.5	24.6836	0.864703	0.0610507	0.0019526	99.3219	63.9072	1.02785	0.0362503	0.62204	0.000943538	0.00120792	7.52194e-05	12926	16.6615	8064.95	6.22695	95.4123	5.03514	980.77	31.2031	30.9361	0.839939	0.0132106	5.5014e-06	1.00145	57.8566	5.464e-10	28.201	FC-2	sanidine	0.00073	9e-05	0.01215	3e-05	0.000224	1.6e-05	0.000702	1.2e-05	1.96e-05	8e-07	0.0002702	4e-07	263	2.32
	01O	8	24.7299	0.967369	0.0647527	0.00207713	100	64.6545	1.02979	0.0405554	0.62813	0.00114035	0.00118287	8.50175e-05	11614	17.552	7315.17	7.19723	84.2416	5.32009	838.645	26.7631	26.8439	0.893269	0.0132106	5.5014e-06	1.00145	57.8791	5.464e-10	28.201	FC-2	sanidine	0.00073	9e-05	0.01215	3e-05	0.000224	1.6e-05	0.000702	1.2e-05	1.96e-05	8e-07	0.0002702	4e-07	263	2.32
Integrated K/Ca ±2σ					0.0697755	0.00153329	SD
Plateau Age ±2σ			24.6803	0.324349	n=15/15	MSWD=0.709	steps A-O
Total Integrated Age ±2σ			24.6734	0.413513
Isochron Age ±2σ			24.6551	0.485483		MSWD=0.770
(40Ar/36Ar)trapped ±2σ			299.281	10.2718
Notes:
1Corrected: Isotopic intensities corrected for blank, baseline, radioactivity decay and detector intercalibration, not for interfering reactions.
X symbol preceding sample ID denotes analyses excluded from weighted-mean age calculations.
pX symbol preceding sample ID denotes analyses excluded plateau age calculations.
Errors quoted for individual analyses include analytical error only, without interfering reactions or J uncertainties.
Integrated age calculated by summing isotopic measurements of all steps.
Plateau age is inverse-variance-weighted mean of selected steps.
Plateau age error is inverse-variance-weighted mean error (Taylor, 1982) times root MSWD where MSWD>1.
Decay constants and isotopic abundances after Min et al. (2000)
Ages calculated relative to 28.201 Ma Fish Canyon sanidine standard (Kuiper et al., 2008)

## Sheet: S6
Table S6.	Full analytical data for zircon U/Pb analysis of the Kingston Canyon Tuff (sample ID KCT)
							Isotope ratios					Apparent ages (Ma)
			206Pb		206Pb*		207Pb*		206Pb*		error	206Pb*		207Pb*		206Pb*
sample	U (ppm)	Th (ppm)	204Pb	U/Th	207Pb*	±(%)	235U	±(%)	238U	±(%)	correlation	238U	±(Ma)	235U	±(Ma)	207Pb*	±(Ma)	BEST AGE	±(Ma)
Spot 111	148.069	99.9074	419.423	1.48206	90.8816	12.3964	0.00591957	12.4851	0.0039035	1.48559	0.118989	25.1146	0.372374	5.99291	0.746019	NA	NA	25.1146	0.372374
Spot 62	113.357	103.493	1998.59	1.09531	24.5019	3.99576	0.0222609	4.40528	0.00395759	1.85484	0.421048	25.4619	0.471345	22.3554	0.974057	NA	NA	25.4619	0.471345
Spot 87	187.967	194.317	4334.84	0.967322	22.0422	2.83231	0.0248277	3.2381	0.0039708	1.5695	0.484699	25.5468	0.400164	24.9018	0.796537	NA	NA	25.5468	0.400164
Spot 40	100.225	66.9342	547.085	1.49736	41.9959	14.7934	0.0130573	14.8685	0.00397875	1.49186	0.100337	25.5978	0.381125	13.1723	1.94588	NA	NA	25.5978	0.381125
Spot 73	150.924	72.0575	634.953	2.09449	42.3425	9.94534	0.0129628	10.0267	0.00398256	1.27462	0.127123	25.6222	0.325938	13.0776	1.30284	NA	NA	25.6222	0.325938
Spot 41	218.694	65.1671	1268.7	3.3559	26.7282	5.02445	0.0206467	5.38668	0.00400413	1.94195	0.360511	25.7607	0.499263	20.7508	1.10643	NA	NA	25.7607	0.499263
Spot 82	92.1109	79.4246	553.904	1.15973	54.7199	29.3426	0.0100995	29.376	0.0040099	1.4003	0.0476684	25.7978	0.360526	10.2035	2.98236	NA	NA	25.7978	0.360526
Spot 11	209.136	174.843	452.246	1.19613	92.3256	11.8999	0.00600147	11.9421	0.00402039	1.00357	0.0840366	25.8651	0.259055	6.07558	0.723386	NA	NA	25.8651	0.259055
Spot 119	243.123	117.661	1007.37	2.0663	29.7506	5.2627	0.0187344	5.53927	0.00404412	1.72846	0.312038	26.0175	0.448796	18.8466	1.03434	NA	NA	26.0175	0.448796
Spot 78	127.108	83.6538	1276.22	1.51945	25.6574	15.4209	0.0217236	15.5024	0.0040442	1.58816	0.102446	26.018	0.412376	21.8216	3.3468	NA	NA	26.018	0.412376
Spot 65	113.295	77.4737	2520.21	1.46237	25.438	3.69806	0.0219803	3.85962	0.00405699	1.10499	0.286296	26.1001	0.287822	22.0767	0.842881	NA	NA	26.1001	0.287822
Spot 26	125.207	88.8405	862.033	1.40934	30.2043	6.65241	0.0185229	6.72801	0.00405943	1.00575	0.149487	26.1158	0.262128	18.6358	1.24238	NA	NA	26.1158	0.262128
Spot 72	166.383	134.96	3335.04	1.23284	22.3578	4.26785	0.0250454	4.39005	0.00406298	1.02861	0.234306	26.1386	0.268321	25.1174	1.08914	NA	NA	26.1386	0.268321
Spot 67	232.46	96.1305	991.839	2.41817	32.6342	5.28829	0.0171945	5.46213	0.00407146	1.36706	0.25028	26.193	0.357349	17.3106	0.937514	NA	NA	26.193	0.357349
Spot 100	190.949	103.807	7173.37	1.83946	20.8627	2.74289	0.0269568	2.89946	0.00408062	0.939916	0.324169	26.2519	0.246244	27.009	0.772793	94.9074	64.9527	26.2519	0.246244
Spot 76	349.135	338.335	3913.56	1.03192	22.976	1.98789	0.0244994	2.2092	0.00408429	0.96376	0.436249	26.2754	0.252716	24.5764	0.536423	NA	NA	26.2754	0.252716
Spot 30	251.476	150.408	3342.62	1.67196	22.888	5.63358	0.0246173	5.72011	0.00408824	0.991196	0.173282	26.3008	0.260161	24.6933	1.39545	NA	NA	26.3008	0.260161
Spot 49	110.997	86.5827	3360.17	1.28197	24.5254	3.78598	0.0229889	4.01145	0.00409094	1.32592	0.330533	26.3181	0.348244	23.0783	0.915333	NA	NA	26.3181	0.348244
Spot 84	105.093	75.2198	1087.33	1.39714	31.9292	9.43387	0.0176626	9.53982	0.00409194	1.4178	0.148619	26.3245	0.372467	17.7777	1.6812	NA	NA	26.3245	0.372467
Spot 17	140.655	126.56	1847.01	1.11137	22.9578	5.96525	0.0245886	6.05157	0.00409592	1.01847	0.168298	26.3501	0.267819	24.6648	1.47463	NA	NA	26.3501	0.267819
Spot 106	342.449	244.969	3545.43	1.39792	24.5545	2.48641	0.0230905	2.65314	0.00411389	0.925691	0.348904	26.4654	0.244486	23.1791	0.608007	NA	NA	26.4654	0.244486
Spot 86	126.233	57.6778	1255.33	2.18859	27.608	3.70356	0.0205378	4.02903	0.00411411	1.58643	0.39375	26.4668	0.419017	20.6424	0.823294	NA	NA	26.4668	0.419017
Spot 18	168.191	85.7208	1010.11	1.96208	31.6156	3.12211	0.0179866	3.31318	0.00412608	1.10886	0.334683	26.5437	0.293729	18.101	0.594404	NA	NA	26.5437	0.293729
Spot 59	435.879	328.418	1652.38	1.32721	17.8763	8.37441	0.0320524	8.52301	0.00415744	1.5846	0.18592	26.745	0.422923	32.0348	2.68771	448.999	186.352	26.745	0.422923
Spot 124	505.174	281.714	5320.11	1.79322	22.9379	1.58901	0.0249841	1.90035	0.00415821	1.04228	0.54847	26.75	0.278233	25.0567	0.470337	NA	NA	26.75	0.278233
Spot 77	168.1	266.952	5795.38	0.629702	17.0515	3.814	0.0336561	3.9451	0.00416404	1.00855	0.255647	26.7874	0.269605	33.6113	1.3043	553.022	83.2738	26.7874	0.269605
Spot 54	204.778	95.2663	2599.33	2.14953	23.6843	3.2518	0.0243232	3.51471	0.00417995	1.33379	0.379488	26.8895	0.357902	24.4018	0.84743	NA	NA	26.8895	0.357902
Spot 35	64.0711	46.3339	4343.64	1.38281	19.9592	5.40574	0.0293725	5.54951	0.00425375	1.25503	0.226152	27.3633	0.34269	29.3947	1.60788	198.737	125.642	27.3633	0.34269
Spot 13	169.9	75.0375	5671.61	2.2642	21.2678	2.51711	0.027738	2.82771	0.00428041	1.28844	0.45565	27.5344	0.354009	27.7812	0.774921	49.1553	NA	27.5344	0.354009
Spot 89	242.219	126.546	1226.58	1.91408	23.2471	3.26901	0.0254472	3.42716	0.00429237	1.02908	0.300272	27.6111	0.283533	25.5154	0.863557	NA	NA	27.6111	0.283533
Spot 121	168.511	92.6969	3120.29	1.81787	21.7737	3.21173	0.027207	3.54237	0.00429835	1.49437	0.421858	27.6495	0.412303	27.2564	0.952678	NA	NA	27.6495	0.412303
Spot 118	171.11	51.6922	71893.9	3.31016	21.1981	2.68482	0.0281642	2.9091	0.00433193	1.12011	0.385036	27.8651	0.311446	28.2021	0.809141	56.99	NA	27.8651	0.311446
Spot 27	230.494	180.106	2269.46	1.27977	23.5855	4.73618	0.0256297	4.90721	0.00438609	1.28428	0.261714	28.2127	0.36154	25.6961	1.24514	NA	NA	28.2127	0.36154
Spot 97	326.658	137.014	1965.12	2.38413	25.6868	7.04095	0.0236344	7.09791	0.00440496	0.897411	0.126433	28.3339	0.253713	23.7187	1.66403	NA	NA	28.3339	0.253713
Spot 85	295.885	167.611	50258.5	1.76531	21.7842	1.89744	0.0281938	2.10616	0.00445639	0.914124	0.434024	28.6639	0.261442	28.2314	0.586409	NA	NA	28.6639	0.261442
Spot 102	81.147	117.871	194.846	0.688442	32.3714	3.51298	0.0194185	3.75933	0.00456105	1.33846	0.356037	29.3356	0.391752	19.5282	0.727115	NA	NA	29.3356	0.391752
Spot 9	201.608	107.54	1095.97	1.87472	30.4753	8.26993	0.0207445	8.37773	0.0045871	1.33968	0.159909	29.5027	0.394339	20.8481	1.72879	NA	NA	29.5027	0.394339
Spot 19	199.32	163.576	1202.58	1.21852	27.3485	4.28938	0.0234585	4.40593	0.00465503	1.0067	0.228487	29.9386	0.300693	23.5443	1.02541	NA	NA	29.9386	0.300693
Spot 5	310.282	184.453	13968.5	1.68217	21.3208	2.06198	0.0301414	2.3017	0.0046629	1.02278	0.44436	29.9891	0.306011	30.1529	0.683827	43.2017	NA	29.9891	0.306011
Spot 127	219.274	105.563	88185.6	2.07718	13.8717	6.17026	0.0464697	6.39045	0.00467723	1.66306	0.260241	30.0811	0.499101	46.1211	2.88142	987.552	125.658	30.0811	0.499101
Spot 8	309.507	244.766	1.8121e+07	1.2645	21.8224	1.84543	0.0298594	1.98345	0.00472793	0.726951	0.366509	30.4064	0.220519	29.8749	0.58392	NA	NA	30.4064	0.220519
Spot 96	223.424	148.786	926.452	1.50165	16.1103	7.3443	0.0407424	7.45953	0.00476253	1.30605	0.175085	30.6284	0.399073	40.5486	2.96514	675.644	157.237	30.6284	0.399073
Spot 58	360.311	163.332	2135.5	2.20601	21.7132	2.70771	0.030524	2.98263	0.00480899	1.25076	0.419347	30.9265	0.385889	30.53	0.897044	-0.533388	NA	30.9265	0.385889
Spot 108	251.254	114.1	8933.99	2.20205	21.7567	2.01288	0.0304661	2.24133	0.00480947	0.985837	0.439845	30.9295	0.304184	30.4729	0.672849	NA	NA	30.9295	0.304184
Spot 3	383.987	213.627	1441.7	1.79746	20.8208	11.1097	0.0319783	11.154	0.00483102	0.992929	0.0890198	31.0678	0.307739	31.9618	3.50952	99.6913	NA	31.0678	0.307739
Spot 117	239.532	395.341	2461.92	0.605888	24.414	4.7785	0.0275403	4.98696	0.0048786	1.42677	0.286099	31.373	0.446532	27.5858	1.35717	NA	NA	31.373	0.446532
Spot 83	171.792	97.7004	3556.64	1.75835	17.3737	4.99937	0.0388091	5.16641	0.0048923	1.30312	0.252228	31.4609	0.408973	38.6606	1.95982	512.036	109.926	31.4609	0.408973
Spot 52	134.924	210.832	1030.58	0.63996	21.9826	6.17856	0.0311968	6.31721	0.00497595	1.31623	0.208357	31.9975	0.420118	31.1926	1.94054	NA	NA	31.9975	0.420118
Spot 125	94.7083	69.3387	437.405	1.36588	5.36406	22.1751	0.127886	22.2441	0.00497741	1.75109	0.0787213	32.0069	0.559078	122.196	25.615	2710.15	370.928	32.0069	0.559078
Spot 64	225.002	150.918	1500.72	1.49089	25.4787	12.2271	0.0273057	12.2735	0.005048	1.06604	0.086857	32.4597	0.345164	27.354	3.31249	NA	NA	32.4597	0.345164
Spot 126	285.617	59.8933	1391.49	4.76877	27.6627	2.29349	0.0252396	2.50372	0.00506599	1.00425	0.401102	32.575	0.326309	25.3098	0.625854	NA	NA	32.575	0.326309
Spot 14	268.009	161.063	1023.73	1.664	32.5268	5.81243	0.0215064	5.93458	0.0050757	1.19788	0.201847	32.6373	0.389968	21.6057	1.26866	NA	NA	32.6373	0.389968
Spot 94	242.489	165.75	783.957	1.46299	36.3165	8.31708	0.0192887	8.41572	0.00508269	1.28466	0.152651	32.6821	0.418794	19.3989	1.61706	NA	NA	32.6821	0.418794
Spot 33	115.407	57.6259	726.153	2.0027	36.9682	7.55869	0.0190389	7.68412	0.0051069	1.3827	0.179942	32.8374	0.452887	19.15	1.45772	NA	NA	32.8374	0.452887
Spot 91	231.743	149.087	1310.09	1.55442	28.9995	9.14906	0.024336	9.21282	0.00512067	1.082	0.117445	32.9257	0.355347	24.4145	2.22244	NA	NA	32.9257	0.355347
Spot 99	159.579	85.5281	2059.07	1.8658	23.4965	6.10151	0.0300854	6.52747	0.00512917	2.31935	0.355322	32.9802	0.762975	30.0977	1.93579	NA	NA	32.9802	0.762975
Spot 88	217.783	127.302	1136.42	1.71076	27.3473	4.48915	0.0259252	4.71777	0.00514429	1.45083	0.307525	33.0772	0.478666	25.9886	1.21052	NA	NA	33.0772	0.478666
Spot 12	172.496	100.452	609.194	1.7172	34.7741	3.03483	0.0204361	3.20009	0.00515635	1.01508	0.317203	33.1546	0.335681	20.5413	0.650736	NA	NA	33.1546	0.335681
Spot 74	239.276	130.319	1172.19	1.83608	30.1854	2.43868	0.0236094	2.73274	0.00517093	1.23317	0.451256	33.2481	0.408949	23.6939	0.639998	NA	NA	33.2481	0.408949
Spot 122	110.901	85.8484	1107.05	1.29182	29.4071	4.47418	0.0242669	4.66977	0.00517791	1.33733	0.286381	33.2928	0.444089	24.346	1.12338	NA	NA	33.2928	0.444089
Spot 37	160.251	88.0249	2307.3	1.82052	25.0498	2.68019	0.0284954	2.99546	0.00517926	1.33766	0.446564	33.3015	0.444313	28.5292	0.842687	NA	NA	33.3015	0.444313
Spot 29	206.365	102.029	1904.55	2.02262	24.1217	3.76137	0.0295939	3.94843	0.00517961	1.2009	0.304147	33.3037	0.398914	29.6131	1.15237	NA	NA	33.3037	0.398914
Spot 115	83.8986	48.9458	496.041	1.71411	66.3329	58.1105	0.0107681	58.1268	0.00518269	1.37557	0.023665	33.3235	0.457206	10.8753	6.28781	NA	NA	33.3235	0.457206
Spot 16	298.884	181.157	1146.03	1.64986	29.8206	2.78076	0.0239588	3.03337	0.00518404	1.21191	0.399524	33.3322	0.402912	24.0405	0.720673	NA	NA	33.3322	0.402912
Spot 90	383.453	211.148	4441.17	1.81604	22.4357	2.04385	0.0318765	2.28374	0.00518916	1.01888	0.446146	33.365	0.33907	31.8617	0.716339	NA	NA	33.365	0.33907
Spot 104	199.589	102.134	19444	1.95419	21.0148	1.92555	0.0340318	2.28537	0.00518917	1.23093	0.538614	33.365	0.40964	33.9803	0.763726	77.6567	45.7248	33.365	0.40964
Spot 70	258.473	159.561	5216.58	1.6199	23.0285	1.73432	0.0310859	2.83345	0.00519417	2.24066	0.79079	33.3971	0.746381	31.0834	0.867388	NA	NA	33.3971	0.746381
Spot 38	249.276	139.664	1116.57	1.78482	27.5873	3.15946	0.0259652	3.33858	0.00519743	1.07886	0.323149	33.418	0.3596	26.0281	0.857927	NA	NA	33.418	0.3596
Spot 95	233.354	139.604	959.294	1.67154	29.644	14.1169	0.0241783	14.1757	0.00520057	1.28924	0.0909469	33.4382	0.429981	24.2582	3.39803	NA	NA	33.4382	0.429981
Spot 105	178.466	136.644	3694.64	1.30607	23.1506	2.54781	0.0310153	2.77666	0.00520986	1.10386	0.397549	33.4977	0.368808	31.0139	0.848134	NA	NA	33.4977	0.368808
Spot 31	246.84	162.187	10946.7	1.52195	22.3233	1.5112	0.0321773	1.91641	0.0052119	1.17852	0.61496	33.5108	0.393906	32.1577	0.606617	NA	NA	33.5108	0.393906
Spot 114	432.366	407.665	2490.56	1.06059	22.7029	4.67615	0.0316699	4.80229	0.00521695	1.09342	0.227688	33.5432	0.365816	31.6583	1.49687	NA	NA	33.5432	0.365816
Spot 34	169.474	100.182	1724.81	1.69166	18.4475	4.24277	0.0390385	4.95615	0.0052254	2.5617	0.516873	33.5974	0.858426	38.8849	1.89076	378.692	95.4694	33.5974	0.858426
Spot 10	246.515	126.622	2039.5	1.94686	24.4011	2.4874	0.0295273	2.78272	0.00522784	1.24755	0.44832	33.613	0.418248	29.5475	0.810375	NA	NA	33.613	0.418248
Spot 45	156.564	94.0469	1751.32	1.66474	26.1978	3.46815	0.0275359	3.66353	0.00523423	1.1804	0.322204	33.654	0.396218	27.5815	0.996856	NA	NA	33.654	0.396218
Spot 43	161.19	92.7545	18933	1.73781	19.8776	2.45365	0.0363217	2.66165	0.00523865	1.03148	0.387536	33.6823	0.346521	36.2265	0.947223	208.252	56.9072	33.6823	0.346521
Spot 42	214.546	155.149	1453.42	1.38284	24.5988	5.54936	0.0293618	5.67839	0.00524066	1.20363	0.211966	33.6952	0.404507	29.3842	1.64464	NA	NA	33.6952	0.404507
Spot 98	185.937	108.171	3430.46	1.71891	23.7479	3.19942	0.0304259	3.7171	0.00524272	1.89224	0.509063	33.7085	0.63618	30.4333	1.11445	NA	NA	33.7085	0.63618
Spot 71	218.464	117.974	1706.01	1.85179	24.5806	3.83756	0.0294066	3.98994	0.00524475	1.09214	0.273724	33.7215	0.367325	29.4283	1.15732	NA	NA	33.7215	0.367325
Spot 123	353.593	242.293	2939.77	1.45936	23.34	1.94614	0.0309752	2.21954	0.00524569	1.06719	0.480817	33.7275	0.358998	30.9744	0.677109	NA	NA	33.7275	0.358998
Spot 22	253.653	221.579	4425.75	1.14475	23.4144	2.82647	0.0309265	3.09068	0.00525413	1.25035	0.404555	33.7816	0.421283	30.9264	0.941425	NA	NA	33.7816	0.421283
Spot 109	116.789	53.6791	2446.12	2.17568	24.1686	3.26339	0.0299619	3.3964	0.00525423	0.941161	0.277106	33.7822	0.317114	29.976	1.00322	NA	NA	33.7822	0.317114
Spot 116	278.561	180.42	4158.37	1.54396	22.2121	1.89757	0.032665	2.05272	0.00526453	0.782858	0.381377	33.8483	0.26429	32.6373	0.659299	NA	NA	33.8483	0.26429
Spot 60	319.34	188.6	7284.48	1.69321	22.1312	2.02602	0.0328045	2.27756	0.00526777	1.04045	0.456828	33.8691	0.351469	32.7745	0.734541	NA	NA	33.8691	0.351469
Spot 130	165.504	90.8856	2625.14	1.82101	22.3048	5.51046	0.0325535	5.61606	0.00526846	1.08399	0.193017	33.8735	0.366224	32.5276	1.79782	NA	NA	33.8735	0.366224
Spot 128	171.488	97.9451	4322.66	1.75086	21.3951	3.23794	0.0339429	3.38909	0.00526928	1.00085	0.295314	33.8788	0.338185	33.893	1.12971	34.9052	NA	33.8788	0.338185
Spot 113	132.109	94.4924	1772.65	1.39809	23.6974	3.87519	0.0306567	4.07315	0.00527125	1.25436	0.307959	33.8914	0.424006	30.6606	1.23019	NA	NA	33.8914	0.424006
Spot 63	190.469	119.055	22652.6	1.59984	20.03	3.71799	0.0363026	3.88891	0.00527602	1.14026	0.293208	33.922	0.385783	36.2077	1.38328	190.518	86.5397	33.922	0.385783
Spot 61	231.579	166.646	6928.73	1.38965	22.7224	2.32883	0.0320241	2.60666	0.00527982	1.17099	0.44923	33.9464	0.396465	32.0069	0.8213	NA	NA	33.9464	0.396465
Spot 23	435.06	132.302	3990.01	3.28838	23.3438	1.59496	0.0311896	1.79583	0.00528286	0.825293	0.459561	33.9659	0.279581	31.1855	0.551526	NA	NA	33.9659	0.279581
Spot 28	131.492	70.9561	32502.9	1.85314	20.4296	2.6416	0.0356523	3.01106	0.00528487	1.44513	0.479942	33.9788	0.489747	35.5704	1.0525	144.33	61.998	33.9788	0.489747
Spot 25	304.526	175.345	4358.14	1.73672	23.3506	4.42523	0.0312002	4.55911	0.00528619	1.09674	0.240559	33.9872	0.371769	31.196	1.40063	NA	NA	33.9872	0.371769
Spot 50	342.593	67.3828	5730.04	5.08428	23.267	1.8407	0.0313765	2.10675	0.00529703	1.0248	0.486436	34.0567	0.348093	31.3695	0.650773	NA	NA	34.0567	0.348093
Spot 51	223	150.879	751.314	1.47801	18.1172	11.2843	0.0404078	11.3104	0.00531183	0.76839	0.0679363	34.1517	0.261724	40.2221	4.4604	419.182	252.702	34.1517	0.261724
Spot 20	121.632	70.0218	4165.12	1.73707	23.4105	2.79625	0.0312829	3.00621	0.00531381	1.10377	0.367162	34.1643	0.376098	31.2774	0.925932	NA	NA	34.1643	0.376098
Spot 48	126.967	88.2996	4980	1.43791	21.2698	4.62153	0.0344424	4.7459	0.0053155	1.07936	0.22743	34.1752	0.367897	34.3834	1.60448	48.9261	NA	34.1752	0.367897
Spot 81	420.563	315.149	2390.47	1.33449	16.3982	5.7809	0.0446792	5.83104	0.00531605	0.76303	0.130857	34.1787	0.260104	44.3822	2.5322	637.692	124.472	34.1787	0.260104
Spot 4	222.99	121.38	1920.9	1.83713	23.9104	7.26402	0.0306534	7.34614	0.00531807	1.09537	0.149108	34.1916	0.373534	30.6574	2.21848	NA	NA	34.1916	0.373534
Spot 101	94.4139	96.574	829.394	0.977632	34.0737	25.9688	0.0215118	26.0222	0.00531843	1.66471	0.0639728	34.1939	0.567723	21.6111	5.5643	NA	NA	34.1939	0.567723
Spot 79	239.71	195.341	4926.91	1.22714	23.0042	2.37928	0.0318724	2.64382	0.00531996	1.15275	0.436016	34.2038	0.393239	31.8576	0.829183	NA	NA	34.2038	0.393239
Spot 1	307.141	77.4145	5100.54	3.96749	22.417	3.82843	0.0327171	3.94691	0.00532156	0.959795	0.243177	34.214	0.327515	32.6885	1.26964	NA	NA	34.214	0.327515
Spot 24	234.628	109.418	335624	2.14432	21.0824	2.13866	0.034859	2.35358	0.00533239	0.98258	0.417484	34.2834	0.335968	34.7923	0.804992	70.0421	50.8984	34.2834	0.335968
Spot 75	166.222	111.465	1571.14	1.49126	19.9083	5.40176	0.0369438	5.47398	0.00533658	0.886235	0.1619	34.3103	0.303262	36.8358	1.98025	204.676	125.434	34.3103	0.303262
Spot 2	228.228	104.874	2524.76	2.17621	23.7584	4.16124	0.0309837	4.32651	0.00534119	1.18436	0.273746	34.3399	0.405628	30.9828	1.32023	NA	NA	34.3399	0.405628
Spot 120	164.791	101.314	62963.6	1.62654	20.2106	2.48617	0.0365133	2.7543	0.00535448	1.18539	0.430378	34.4251	0.406984	36.4141	0.985184	169.557	58.07	34.4251	0.406984
Spot 53	128.06	58.954	1851.95	2.17221	23.7547	9.9072	0.0310945	9.98586	0.00535947	1.25095	0.125272	34.4571	0.429892	31.0919	3.05775	NA	NA	34.4571	0.429892
Spot 68	142.992	78.9013	2988.07	1.81229	22.3667	3.62226	0.03306	3.84521	0.00536528	1.2903	0.335561	34.4944	0.443894	33.0257	1.24948	NA	NA	34.4944	0.443894
Spot 57	199.374	116.66	5137.94	1.70902	22.3296	2.33233	0.0331932	2.65793	0.00537796	1.27467	0.479573	34.5757	0.439546	33.1565	0.867042	NA	NA	34.5757	0.439546
Spot 32	72.5095	44.8003	3599.84	1.61851	21.2469	5.5251	0.0351521	5.7479	0.0054192	1.58479	0.275716	34.8401	0.550651	35.0799	1.98192	51.5002	NA	34.8401	0.550651
Spot 110	315.127	126.987	1964.13	2.48158	23.7684	4.12829	0.0314667	4.24006	0.00542674	0.967124	0.228092	34.8884	0.336503	31.4584	1.31341	NA	NA	34.8884	0.336503
Spot 66	192.687	93.6695	1767.52	2.05709	20.9959	9.13849	0.0357476	9.19537	0.0054459	1.02121	0.111057	35.0113	0.356568	35.6638	3.22251	79.7933	NA	35.0113	0.356568
Spot 7	134.882	68.7867	10348	1.96087	21.372	2.72542	0.0352061	2.98424	0.00545948	1.21564	0.407353	35.0983	0.42551	35.1328	1.03052	37.4667	NA	35.0983	0.42551
Spot 103	187.84	95.0595	2130.69	1.97603	23.1577	6.80202	0.0325379	6.85884	0.00546728	0.881047	0.128454	35.1484	0.308831	32.5123	2.19464	NA	NA	35.1484	0.308831
Spot 112	348.292	37.3093	8616.46	9.33525	22.0297	1.9672	0.0342067	2.20184	0.00546773	0.989035	0.449187	35.1512	0.346712	34.152	0.739466	NA	NA	35.1512	0.346712
Spot 15	213	116.499	727.744	1.82834	11.4889	10.8722	0.0660468	10.9412	0.00550575	1.22709	0.112153	35.395	0.433138	64.941	6.88299	1360.54	210.118	35.395	0.433138
Spot 36	134.159	86.4829	1295.15	1.55128	9.52994	13.8352	0.0832863	14.9781	0.00575906	5.73852	0.383128	37.0188	2.11824	81.2299	11.6932	1712.31	255.727	37.0188	2.11824
Spot 56	200.376	179.064	337.943	1.11902	7.18574	22.936	0.113976	23.1898	0.00594255	3.42148	0.147543	38.1948	1.30296	109.596	24.096	2216.07	403.437	38.1948	1.30296
Spot 93	133.353	43.9495	39891.1	3.03423	13.0952	0.702619	1.94339	0.978416	0.184654	0.6809	0.695921	1092.35	6.84179	1096.17	6.55952	1103.77	14.0664	1103.77	14.0664
Spot 44	109.113	28.0533	39451.5	3.88947	12.9123	0.939907	1.83135	1.78507	0.171579	1.51758	0.850151	1020.81	14.3273	1056.77	11.7242	1131.8	18.7151	1131.8	18.7151
Spot 6	82.0543	38.3969	31174.4	2.137	12.888	0.643727	2.16964	0.980272	0.20289	0.73929	0.754168	1190.83	8.03838	1171.36	6.81336	1135.59	12.8194	1135.59	12.8194
Spot 55	145.295	114.613	96549.3	1.2677	9.86068	0.582858	4.02913	0.852274	0.288275	0.62181	0.729589	1632.9	8.96962	1640.1	6.93321	1649.31	10.8076	1649.31	10.8076
Spot 46	21.2416	12.9212	39145.5	1.64393	8.73183	0.664464	5.2829	0.96191	0.334708	0.695528	0.723069	1861.16	11.2438	1866.1	8.21271	1871.6	11.9853	1871.6	11.9853

## Sheet: S7
Table S7.	Full analytical data for zircon U/Pb analysis of the Mt. Dutton Formation breccia
							Isotope ratios					Apparent ages (Ma)
			206Pb		206Pb*		207Pb*		206Pb*		error	206Pb*		207Pb*		206Pb*
sample	U (ppm)	Th (ppm)	204Pb	U/Th	207Pb*	±(%)	235U	±(%)	238U	±(%)	correlation	238U	±(Ma)	235U	±(Ma)	207Pb*	±(Ma)	BEST AGE	±(Ma)
Spot 96	93.154	61.9865	1500.88	1.50281	23.5468	5.60068	0.0228632	5.9446	0.00390622	1.99267	0.335207	25.1321	0.499825	22.9535	1.34919	NA	NA	25.1321	0.499825
Spot 4	65.3874	47.8441	1224.57	1.36668	25.3046	5.44029	0.0213227	5.71472	0.00391497	1.74964	0.306164	25.1882	0.439844	21.4231	1.21145	NA	NA	25.1882	0.439844
Spot 112	311.259	229.224	8359.97	1.35788	20.3178	2.58076	0.0266141	2.79983	0.00392353	1.08571	0.387775	25.2432	0.273531	26.6702	0.736999	157.208	60.4257	25.2432	0.273531
Spot 138	179.39	142.377	6579.77	1.25997	20.276	4.4342	0.0266812	4.68231	0.00392533	1.50395	0.321199	25.2548	0.379077	26.7366	1.23555	162.045	103.714	25.2548	0.379077
Spot 41	79.5406	80.4663	4101.94	0.988496	22.4145	5.34563	0.024143	5.70972	0.00392653	2.00627	0.351378	25.2625	0.505841	24.2231	1.36671	NA	NA	25.2625	0.505841
Spot 129	87.7575	85.3214	2213.03	1.02855	23.7901	4.42146	0.0227831	4.70886	0.00393275	1.61989	0.344009	25.3024	0.409069	22.874	1.06506	NA	NA	25.3024	0.409069
Spot 82	92.6146	56.8446	4113	1.62926	24.2892	4.43056	0.0223361	4.68368	0.00393648	1.51887	0.324291	25.3264	0.383921	22.4301	1.03903	NA	NA	25.3264	0.383921
Spot 1	88.2881	58.9198	3961.39	1.49844	18.8769	6.0426	0.0289903	6.21371	0.00397073	1.44817	0.23306	25.5463	0.369221	29.0176	1.77755	326.721	137.262	25.5463	0.369221
Spot 116	388.719	118.208	14082	3.28843	22.0853	2.27142	0.0248785	2.61982	0.0039867	1.30541	0.498283	25.6489	0.334158	24.9521	0.645733	NA	NA	25.6489	0.334158
Spot 47	229.414	181.316	38081.9	1.26527	22.2873	3.13303	0.0246653	3.44034	0.0039887	1.42129	0.413124	25.6616	0.364001	24.7408	0.840882	NA	NA	25.6616	0.364001
Spot 89	233.632	276.436	105677	0.845158	19.5748	3.94243	0.0281215	4.22588	0.00399415	1.52161	0.36007	25.6967	0.390226	28.16	1.17366	243.703	90.8594	25.6967	0.390226
Spot 38	69.5254	55.7538	50113.1	1.24701	17.9232	6.01717	0.030717	6.42544	0.00399468	2.25386	0.350772	25.7001	0.578091	30.7201	1.94434	443.175	133.938	25.7001	0.578091
Spot 81	71.9431	59.2073	87938.1	1.21511	17.7015	6.15938	0.0311162	6.44348	0.00399654	1.89221	0.293663	25.712	0.485557	31.1133	1.97438	470.819	136.419	25.712	0.485557
Spot 49	93.2592	106.839	2184.3	0.872895	22.2193	9.10381	0.0247955	9.24997	0.00399751	1.6379	0.177071	25.7182	0.4204	24.8698	2.27251	NA	NA	25.7182	0.4204
Spot 24	112.104	110.843	5431.97	1.01138	22.0177	4.42307	0.0250566	4.65168	0.00400296	1.44034	0.309638	25.7532	0.370194	25.1285	1.15455	NA	NA	25.7532	0.370194
Spot 124	198.602	205.033	12647.4	0.968636	24.4951	3.45441	0.0225593	3.67565	0.00400953	1.25598	0.341703	25.7954	0.323339	22.6518	0.823384	NA	NA	25.7954	0.323339
Spot 80	28.6035	35.993	828.261	0.794696	23.564	11.0581	0.0234629	11.6731	0.0040116	3.739	0.320309	25.8087	0.963059	23.5487	2.71723	NA	NA	25.8087	0.963059
Spot 77	656.347	274.619	18636.5	2.39003	20.7771	2.00151	0.0266444	2.27417	0.00401679	1.07972	0.474776	25.842	0.278463	26.7001	0.599292	104.626	47.3096	25.842	0.278463
Spot 2	125.044	69.5307	8929.91	1.7984	23.8398	3.63694	0.0232273	3.91284	0.00401782	1.44327	0.368855	25.8486	0.372319	23.3149	0.901881	NA	NA	25.8486	0.372319
Spot 28	58.8547	47.6156	848.42	1.23604	31.9255	5.31568	0.0173588	5.59123	0.00402111	1.7336	0.310058	25.8698	0.44758	17.4746	0.968687	NA	NA	25.8698	0.44758
Spot 62	162.556	143.763	7466.63	1.13072	22.2256	3.98618	0.0249529	4.29736	0.00402404	1.6055	0.373602	25.8886	0.414808	25.0258	1.0623	NA	NA	25.8886	0.414808
Spot 111	114.091	126.699	4091.22	0.900487	23.0441	4.48269	0.0240817	4.8643	0.00402657	1.88862	0.388261	25.9048	0.488261	24.1624	1.16146	NA	NA	25.9048	0.488261
Spot 43	138.044	96.5945	14761	1.42911	20.5325	4.49491	0.027035	4.69325	0.00402769	1.34998	0.287642	25.912	0.349105	27.0864	1.25443	132.523	105.722	25.912	0.349105
Spot 75	293.711	209.403	475937	1.40261	21.5463	2.66303	0.025787	2.92644	0.00403144	1.21338	0.414628	25.9361	0.314072	25.8517	0.746985	17.9923	NA	25.9361	0.314072
Spot 23	50.6978	38.6033	3625.42	1.3133	17.0088	7.21822	0.0327009	7.52239	0.00403571	2.11748	0.281491	25.9635	0.548667	32.6726	2.41864	558.519	157.562	25.9635	0.548667
Spot 91	83.7351	77.0515	5369.94	1.08674	19.5763	5.30022	0.0284122	5.4962	0.00403574	1.45459	0.264654	25.9637	0.376906	28.447	1.54181	243.528	122.188	25.9637	0.376906
Spot 88	331.335	302.91	12138.9	1.09384	22.2494	3.1584	0.0250257	3.39185	0.00404009	1.23659	0.364578	25.9916	0.320763	25.0979	0.840849	NA	NA	25.9916	0.320763
Spot 127	408.119	361.978	16949.2	1.12747	22.1221	2.67504	0.0251753	2.8864	0.00404099	1.08421	0.375625	25.9974	0.281298	25.2461	0.719719	NA	NA	25.9974	0.281298
Spot 48	279.169	287.913	9394.9	0.969631	20.6108	3.71354	0.0270406	3.94991	0.00404389	1.34588	0.340736	26.016	0.349438	27.0919	1.05596	123.564	87.4862	26.016	0.349438
Spot 139	159.762	71.4055	7683.07	2.23739	23.5825	2.97308	0.0236347	3.44277	0.00404415	1.73592	0.504224	26.0177	0.450738	23.719	0.807127	NA	NA	26.0177	0.450738
Spot 100	316.543	363.051	11245.6	0.871896	22.118	2.85272	0.0252072	3.04378	0.00404538	1.06142	0.348717	26.0256	0.275683	25.2777	0.7599	NA	NA	26.0256	0.275683
Spot 7	284.329	208.054	14176	1.36661	22.2389	2.81979	0.0251012	3.08414	0.00405038	1.24928	0.405066	26.0577	0.324877	25.1727	0.766817	NA	NA	26.0577	0.324877
Spot 59	75.1106	76.3044	1661.3	0.984355	19.8619	5.87583	0.0281312	6.15276	0.00405414	1.82515	0.296639	26.0818	0.47507	28.1696	1.70939	210.055	136.325	26.0818	0.47507
Spot 27	121.055	102.14	12278.2	1.18518	22.4638	4.1564	0.0248744	4.32823	0.00405437	1.20744	0.278968	26.0833	0.314304	24.948	1.06665	NA	NA	26.0833	0.314304
Spot 92	92.1517	66.5389	2509.61	1.38493	20.0113	4.78739	0.0279346	5.08939	0.00405608	1.72708	0.339348	26.0943	0.449757	27.9754	1.40435	192.69	111.38	26.0943	0.449757
Spot 120	97.5899	70.2937	1274.31	1.38832	22.8596	5.81878	0.0244621	6.15811	0.00405743	2.01596	0.327367	26.1029	0.525162	24.5395	1.49306	NA	NA	26.1029	0.525162
Spot 9	162.757	142.489	96421.2	1.14224	19.3857	4.44875	0.0288615	4.76538	0.00405966	1.70806	0.35843	26.1172	0.445194	28.8906	1.35735	266.041	102.125	26.1172	0.445194
Spot 148	531.699	518.34	12671.7	1.02577	18.6682	3.34724	0.0299839	3.67621	0.00406143	1.52001	0.413473	26.1286	0.396354	29.9976	1.08664	351.903	75.6329	26.1286	0.396354
Spot 14	149.112	130.746	5466.14	1.14047	19.5751	4.36428	0.0286029	4.64259	0.00406258	1.58326	0.34103	26.136	0.412965	28.6353	1.31085	243.68	100.596	26.136	0.412965
Spot 125	177.144	157.247	16515.3	1.12653	20.0449	3.7423	0.0279361	3.92377	0.00406309	1.17948	0.300599	26.1393	0.307684	27.9769	1.08276	188.749	87.1213	26.1393	0.307684
Spot 152	366.183	301.739	13492.3	1.21357	20.6737	2.78179	0.0270867	3.00238	0.00406315	1.12957	0.376226	26.1397	0.294668	27.1375	0.803978	116.383	65.6144	26.1397	0.294668
Spot 78	305.464	217.478	25959.3	1.40457	21.7995	3.17517	0.0257	3.40885	0.00406507	1.24038	0.36387	26.152	0.323727	25.7657	0.867264	NA	NA	26.152	0.323727
Spot 29	108.181	72.4986	6427.61	1.49219	23.7063	4.61348	0.0236331	4.82931	0.00406511	1.4276	0.295612	26.1523	0.372594	23.7175	1.13212	NA	NA	26.1523	0.372594
Spot 155	301.22	126.588	6200.7	2.37954	20.9449	3.33359	0.0267499	3.56217	0.00406525	1.25549	0.35245	26.1532	0.327685	26.8044	0.942327	85.6082	79.0884	26.1532	0.327685
Spot 95	106.541	68.2255	5354.34	1.5616	17.7925	4.8593	0.0314986	5.14719	0.00406645	1.69727	0.329746	26.1609	0.44312	31.4897	1.59596	459.443	107.819	26.1609	0.44312
Spot 61	106.965	70.077	17865.4	1.52639	20.8844	4.54484	0.0268406	4.76291	0.00406728	1.42472	0.299127	26.1662	0.372039	26.8942	1.26413	92.4396	NA	26.1662	0.372039
Spot 39	576.371	337.97	26736.5	1.70539	21.6345	1.90791	0.0259162	2.24768	0.00406823	1.18826	0.528659	26.1723	0.310364	25.9797	0.576533	8.17146	NA	26.1723	0.310364
Spot 122	234.342	143.445	23749.5	1.63367	22.0951	2.70731	0.025385	3.03652	0.00406969	1.37509	0.452853	26.1817	0.359292	25.4537	0.7633	NA	NA	26.1817	0.359292
Spot 131	187.415	113.963	12815.2	1.64452	20.2547	3.39652	0.0276986	3.60731	0.00407071	1.21506	0.336832	26.1882	0.317556	27.7422	0.987201	164.464	79.3878	26.1882	0.317556
Spot 15	114.557	86.5626	12919.4	1.3234	23.0986	4.31606	0.0243031	4.54139	0.00407319	1.41273	0.31108	26.2041	0.369443	24.3818	1.09409	NA	NA	26.2041	0.369443
Spot 22	351.29	222.431	7224.71	1.57932	21.1307	3.3413	0.0265683	3.47312	0.00407347	0.9478	0.272896	26.206	0.247876	26.6248	0.912695	64.5961	NA	26.206	0.247876
Spot 58	147.975	116.665	7803.65	1.26838	18.6729	4.52892	0.0300735	4.75658	0.00407459	1.45395	0.305672	26.2131	0.380353	30.086	1.41007	351.324	102.394	26.2131	0.380353
Spot 115	308.474	255.64	45315.8	1.20667	19.8505	3.08341	0.0283	3.31665	0.0040761	1.22178	0.368378	26.2228	0.319736	28.3362	0.926821	211.374	71.4702	26.2228	0.319736
Spot 134	212.606	220.391	11335.8	0.964677	22.1587	2.99464	0.0253642	3.33933	0.00407805	1.47759	0.442482	26.2354	0.386865	25.4332	0.838752	NA	NA	26.2354	0.386865
Spot 150	477.899	272.583	151951	1.75322	21.1419	2.43091	0.0266608	2.63675	0.00408984	1.02133	0.387343	26.311	0.268174	26.7164	0.695256	63.3549	57.8904	26.311	0.268174
Spot 117	693.181	413.556	205916	1.67615	21.1593	1.6971	0.0266654	1.97284	0.0040939	1.00595	0.509898	26.3371	0.264396	26.7209	0.520283	61.35	40.429	26.3371	0.264396
Spot 20	65.8956	29.154	4581.71	2.26026	17.8712	6.35637	0.0316006	6.60818	0.00409767	1.8068	0.273419	26.3613	0.475325	31.5902	2.0554	449.631	141.312	26.3613	0.475325
Spot 99	58.3312	36.0734	3516.79	1.61701	15.9341	8.50368	0.035509	8.69142	0.00410538	1.79673	0.206725	26.4108	0.473561	35.4299	3.02626	699.111	181.432	26.4108	0.473561
Spot 16	132.053	68.8923	7464.77	1.91681	21.6727	3.96473	0.0261226	4.26195	0.00410787	1.56369	0.366896	26.4268	0.412389	26.1839	1.10168	3.9222	NA	26.4268	0.412389
Spot 73	117.395	63.7366	3404.84	1.84187	18.194	5.66196	0.0311359	5.93813	0.00411035	1.78985	0.301417	26.4427	0.472316	31.1327	1.82065	409.726	126.714	26.4427	0.472316
Spot 146	324.982	169.524	95751.5	1.91703	20.9994	3.20219	0.0269841	3.42863	0.00411152	1.22536	0.35739	26.4502	0.323446	27.036	0.914734	79.397	76.0448	26.4502	0.323446
Spot 68	69.266	43.1257	4221.92	1.60614	24.7051	4.71136	0.0229545	5.01625	0.00411475	1.72216	0.343317	26.4709	0.454937	23.0441	1.14293	NA	NA	26.4709	0.454937
Spot 93	179.478	121.62	16339.2	1.47574	24.746	3.8075	0.0229174	4.03759	0.00411489	1.34352	0.332753	26.4718	0.354925	23.0073	0.918493	NA	NA	26.4718	0.354925
Spot 8	94.92	68.9775	3461	1.3761	18.699	6.64971	0.030344	6.93666	0.00411697	1.97449	0.284646	26.4852	0.521876	30.3525	2.0743	348.208	150.508	26.4852	0.521876
Spot 114	114.758	76.1533	13770.4	1.50694	19.0293	4.80347	0.0298202	5.0244	0.00411739	1.47353	0.293276	26.4879	0.389507	29.8362	1.47728	308.468	109.417	26.4879	0.389507
Spot 107	207.867	125.829	10677.9	1.65198	22.7024	3.36585	0.0250249	3.69587	0.00412223	1.5266	0.413055	26.519	0.404007	25.0971	0.916188	NA	NA	26.519	0.404007
Spot 53	132.007	117.574	83005.8	1.12276	21.9162	4.46202	0.0259498	4.67368	0.00412655	1.39057	0.297532	26.5467	0.368391	26.0129	1.20032	NA	NA	26.5467	0.368391
Spot 10	335.183	156.759	78462.2	2.1382	22.1676	2.92045	0.0256777	3.13792	0.00413012	1.14784	0.365795	26.5696	0.304348	25.7436	0.797661	NA	NA	26.5696	0.304348
Spot 130	12.6278	6.96809	200	1.81223	30.1023	7.69926	0.0189327	9.01309	0.00413522	4.68585	0.519894	26.6024	1.24398	19.0442	1.70048	NA	NA	26.6024	1.24398
Spot 143	138.512	101.076	28862.4	1.37037	18.1207	5.00334	0.0314747	5.20564	0.00413832	1.43709	0.276065	26.6223	0.381798	31.4662	1.6129	418.751	111.799	26.6223	0.381798
Spot 11	136.304	97.0803	4521.9	1.40403	21.9317	4.45527	0.0260439	4.70048	0.00414445	1.49836	0.318768	26.6616	0.398663	26.1061	1.21147	NA	NA	26.6616	0.398663
Spot 105	50.8139	42.6224	8967.03	1.19219	17.9683	7.74212	0.0318082	8.09745	0.00414699	2.3724	0.292981	26.6779	0.6316	31.7945	2.53466	437.589	172.566	26.6779	0.6316
Spot 97	66.3179	39.4452	20308.1	1.68127	16.2475	5.58556	0.0351908	5.85828	0.00414861	1.76663	0.301561	26.6883	0.470509	35.1178	2.02213	657.528	119.855	26.6883	0.470509
Spot 132	549.061	731.239	89660.5	0.750863	21.1892	2.7561	0.0269921	3.06863	0.00414991	1.34923	0.439685	26.6967	0.359455	27.044	0.818925	57.9928	NA	26.6967	0.359455
Spot 71	256.576	168.521	20749.8	1.52251	22.6556	3.46127	0.0252861	3.66529	0.00415666	1.2058	0.328979	26.74	0.321764	25.3559	0.917857	NA	NA	26.74	0.321764
Spot 158	196.757	129.015	5367.47	1.52507	24.3282	3.33711	0.0235547	3.58105	0.00415791	1.29908	0.362764	26.748	0.346758	23.6397	0.836773	NA	NA	26.748	0.346758
Spot 5	124.711	80.9701	7540.81	1.54021	22.2467	3.9856	0.0257659	4.27764	0.00415908	1.55346	0.363157	26.7555	0.414774	25.8308	1.09101	NA	NA	26.7555	0.414774
Spot 56	143.395	87.5793	6909.16	1.63732	20.6413	3.74695	0.0277719	4.09433	0.00415939	1.65042	0.403098	26.7576	0.440695	27.8147	1.12337	120.093	88.3319	26.7576	0.440695
Spot 123	222.403	220.206	14210.5	1.00998	21.6946	3.0913	0.0264618	3.37612	0.00416542	1.35722	0.402006	26.7963	0.362929	26.5195	0.883741	1.51155	NA	26.7963	0.362929
Spot 69	256.544	179.657	5385.88	1.42796	20.4797	2.91832	0.0280436	3.23203	0.00416722	1.38905	0.429775	26.8078	0.3716	28.0831	0.895217	138.618	68.5342	26.8078	0.3716
Spot 13	668.991	346.938	8678.13	1.92827	22.0398	1.63001	0.0260606	2.01051	0.00416754	1.17696	0.585401	26.8099	0.314885	26.1226	0.518499	NA	NA	26.8099	0.314885
Spot 6	134.58	107.543	20386.7	1.25141	22.4323	3.99076	0.0256073	4.18229	0.00416798	1.25115	0.299154	26.8127	0.334769	25.6739	1.0603	NA	NA	26.8127	0.334769
Spot 55	296.085	138.429	5098.78	2.13889	21.1191	3.54519	0.0272141	3.70388	0.00417021	1.07255	0.289574	26.827	0.287134	27.2634	0.996367	65.8774	NA	26.827	0.287134
Spot 40	53.9761	51.6734	7148.59	1.04456	16.4374	7.7309	0.0349968	7.98297	0.00417397	1.99022	0.249308	26.8512	0.533286	34.9275	2.74085	632.552	166.679	26.8512	0.533286
Spot 51	94.2522	86.1912	3262.76	1.09353	21.7835	5.00044	0.0264379	5.30766	0.00417872	1.77957	0.335283	26.8816	0.477382	26.4959	1.38812	NA	NA	26.8816	0.477382
Spot 126	249.919	145.07	5867.21	1.72275	18.931	4.16306	0.0304231	4.31446	0.00417893	1.13292	0.262586	26.883	0.303928	30.4305	1.29344	320.252	94.6248	26.883	0.303928
Spot 74	78.7352	58.2762	111119	1.35107	20.7298	4.64551	0.027836	5.01587	0.00418687	1.89162	0.377127	26.934	0.508426	27.8779	1.3793	110.031	109.727	26.934	0.508426
Spot 3	194.695	116.32	5645.65	1.67379	22.2697	3.59005	0.0259214	3.9017	0.00418851	1.528	0.391625	26.9445	0.410853	25.9848	1.00099	NA	NA	26.9445	0.410853
Spot 108	165.751	162.245	11167.2	1.02161	14.4446	3.84421	0.0399863	4.11108	0.00419087	1.45706	0.354423	26.9596	0.391998	39.8107	1.60498	904.691	79.2534	26.9596	0.391998
Spot 45	204.468	173.331	10919.4	1.17964	21.4769	3.43642	0.0269236	3.62205	0.00419558	1.14466	0.316026	26.9899	0.308298	26.9763	0.964229	25.785	NA	26.9899	0.308298
Spot 154	544.225	219.81	25978.8	2.47589	21.9179	2.30431	0.026382	2.85067	0.00419559	1.67823	0.588713	26.99	0.452006	26.4405	0.744003	NA	NA	26.99	0.452006
Spot 149	114.751	86.177	3302.53	1.33157	25.2608	4.12425	0.0229156	4.4873	0.00420018	1.76816	0.394038	27.0194	0.476747	23.0056	1.02072	NA	NA	27.0194	0.476747
Spot 140	215.53	155.976	126970	1.38181	22.5496	3.11935	0.025682	3.55	0.00420199	1.69475	0.477394	27.031	0.457149	25.7478	0.902557	NA	NA	27.031	0.457149
Spot 26	900.663	472.87	39882.8	1.90467	21.4173	1.85168	0.0270467	2.13762	0.00420308	1.06803	0.499637	27.038	0.288171	27.098	0.571591	32.3966	NA	27.038	0.288171
Spot 121	187.38	62.1201	50286.3	3.01641	21.107	3.01613	0.0274533	3.99749	0.00420446	2.62353	0.656294	27.0469	0.708096	27.4999	1.08455	67.2431	NA	27.0469	0.708096
Spot 113	1361.47	880.852	48861.3	1.54563	21.614	1.58665	0.0268559	1.99705	0.00421174	1.21274	0.607266	27.0936	0.327885	26.9092	0.530332	10.4775	NA	27.0936	0.327885
Spot 147	2690.67	4475.5	173255	0.601199	21.8414	1.19519	0.0265996	1.6801	0.00421545	1.18079	0.702808	27.1174	0.319527	26.6559	0.442018	NA	NA	27.1174	0.319527
Spot 18	139.629	76.1484	6874.15	1.83364	13.4253	8.05336	0.043301	8.19048	0.00421803	1.49246	0.182219	27.134	0.404112	43.0418	3.45167	1053.81	162.476	27.134	0.404112
Spot 32	103.106	73.6439	17562.9	1.40007	21.0279	3.64146	0.0276982	4.06413	0.00422606	1.80468	0.444051	27.1855	0.489579	27.7418	1.1122	76.1719	NA	27.1855	0.489579
Spot 118	101.033	116.219	5294.81	0.869332	18.2713	7.50746	0.0320666	7.70516	0.00425118	1.73422	0.225073	27.3468	0.473249	32.0487	2.43085	400.239	168.425	27.3468	0.473249
Spot 79	106.011	90.6829	6039.95	1.16903	19.5189	5.66789	0.0300185	5.85534	0.00425141	1.46969	0.251	27.3483	0.401083	30.0318	1.73271	250.272	130.512	27.3483	0.401083
Spot 94	113.471	105.262	2137.41	1.07798	23.5408	5.90761	0.0248996	6.15776	0.00425306	1.73727	0.282126	27.3588	0.474289	24.973	1.51902	NA	NA	27.3588	0.474289
Spot 142	416.305	201.693	13180.5	2.06405	22.6496	2.28233	0.0260804	2.6155	0.00428611	1.27743	0.488407	27.571	0.351448	26.1422	0.675023	NA	NA	27.571	0.351448
Spot 65	396.458	192.851	17831.3	2.05578	21.2529	2.54771	0.0278078	2.86647	0.00428818	1.31371	0.458303	27.5843	0.361603	27.8501	0.787467	50.8612	NA	27.5843	0.361603
Spot 159	116.444	98.7339	3465.14	1.17938	15.4764	6.94011	0.0382517	7.19149	0.00429546	1.88477	0.262084	27.631	0.519667	38.1157	2.69029	760.87	146.496	27.631	0.519667
Spot 156	171.915	68.665	3492.93	2.50367	21.0069	4.56355	0.028206	4.71183	0.00429924	1.17276	0.248897	27.6553	0.323635	28.2434	1.31244	78.5438	NA	27.6553	0.323635
Spot 60	202.888	166.622	74026	1.21766	22.6593	2.73227	0.0262968	3.11033	0.00432351	1.48622	0.477835	27.811	0.412444	26.3563	0.809219	NA	NA	27.811	0.412444
Spot 103	180.277	86.7252	94628.3	2.07871	19.2239	3.4059	0.0311403	3.63902	0.00434361	1.28153	0.352165	27.9401	0.357287	31.137	1.11588	285.244	77.879	27.9401	0.357287
Spot 30	52.1004	15.0743	5984.52	3.45624	20.4383	6.63448	0.0292982	6.97003	0.00434483	2.13658	0.306539	27.9479	0.595838	29.3214	2.01449	143.365	NA	27.9479	0.595838
Spot 76	307.363	252.249	1.06305e+06	1.21849	20.9063	3.05538	0.028721	3.21274	0.00435677	0.993168	0.309134	28.0245	0.277726	28.7519	0.910768	89.9572	72.4018	28.0245	0.277726
Spot 72	730.833	382.491	113900	1.91072	21.6727	2.06451	0.0279463	2.22755	0.00439466	0.836521	0.375534	28.2677	0.235948	27.987	0.61491	3.9226	NA	28.2677	0.235948
Spot 42	1335.35	382.711	42802.3	3.48919	21.6995	1.34356	0.0279348	1.75453	0.00439828	1.12838	0.643124	28.2909	0.31853	27.9756	0.48414	0.992075	NA	28.2909	0.31853
Spot 104	365.366	100.995	8230.49	3.61766	20.6868	2.35117	0.0293936	2.80252	0.00441199	1.52517	0.544214	28.379	0.431877	29.4155	0.812551	114.889	55.4632	28.379	0.431877
Spot 64	280.437	160.972	25312.6	1.74214	21.1775	3.05891	0.0293022	3.27504	0.0045026	1.17002	0.357253	28.9605	0.338083	29.3254	0.946683	59.3496	NA	28.9605	0.338083
Spot 87	257.302	131.491	23939.2	1.95681	7.89215	16.7497	0.0795881	17.046	0.00455755	3.16457	0.185649	29.3131	0.92553	77.7577	12.7604	2052.01	297.989	29.3131	0.92553
Spot 133	570.47	407.13	47208.2	1.4012	21.4018	1.98466	0.0294093	2.22344	0.0045669	1.00239	0.45083	29.3731	0.293764	29.431	0.644986	34.1517	NA	29.3731	0.293764
Spot 145	323.776	205.694	6266.25	1.57406	8.1006	18.054	0.078406	18.2612	0.00460844	2.74281	0.150199	29.6397	0.811094	76.6452	13.4819	2005.85	323.29	29.6397	0.811094
Spot 66	66.0403	58.4907	3107.63	1.12907	19.515	5.36194	0.0325853	5.60546	0.00461402	1.63426	0.291547	29.6755	0.483859	32.559	1.79613	250.731	123.447	29.6755	0.483859
Spot 25	193.043	134.255	8148.73	1.43788	23.2508	3.62344	0.0273789	3.78566	0.00461894	1.09633	0.2896	29.707	0.324938	27.4263	1.02437	NA	NA	29.707	0.324938
Spot 52	192.599	116.445	51692	1.65398	21.8319	3.82055	0.0298115	3.99756	0.0047224	1.17639	0.294277	30.3709	0.35644	29.8277	1.17504	NA	NA	30.3709	0.35644
Spot 144	487.321	399.754	362777	1.21905	20.9229	2.10449	0.0312554	2.52495	0.00474498	1.39516	0.552549	30.5158	0.424737	31.2504	0.777036	88.1039	49.9187	30.5158	0.424737
Spot 86	220.308	113.452	14307.7	1.94187	21.0715	2.98705	0.0315396	3.18164	0.00482213	1.09563	0.344359	31.0108	0.338946	31.5301	0.987759	71.2484	71.0635	31.0108	0.338946
Spot 157	238.818	101.248	14874.4	2.35874	21.2746	2.91389	0.0313776	3.17425	0.0048436	1.25903	0.396638	31.1485	0.391223	31.3706	0.980559	48.4265	NA	31.1485	0.391223
Spot 21	132.297	155.547	9520.3	0.850523	22.1512	4.00262	0.0301738	4.24544	0.00484969	1.41519	0.333343	31.1876	0.440297	30.1848	1.26262	NA	NA	31.1876	0.440297
Spot 160	515.511	463.468	33179.6	1.11229	20.7333	2.42629	0.0323718	2.73845	0.00486993	1.26972	0.463666	31.3174	0.39668	32.349	0.871897	109.614	57.2905	31.3174	0.39668
Spot 83	525.699	376.737	10050.6	1.3954	18.881	2.5461	0.0364487	2.76094	0.00499338	1.06779	0.386747	32.1093	0.342006	36.3509	0.985874	326.261	57.8044	32.1093	0.342006
Spot 19	613.594	313.699	38374	1.956	19.0955	3.15855	0.0372716	12.3608	0.00516413	11.9504	0.966801	33.2044	3.95787	37.1567	4.50987	300.556	72.044	33.2044	3.95787
Spot 63	155.035	184.954	24118.6	0.838236	19.3617	3.68859	0.0372106	3.96357	0.00522754	1.45059	0.36598	33.6111	0.48629	37.097	1.44383	268.852	84.624	33.6111	0.48629
Spot 109	287.303	154.541	235921	1.85908	19.7961	2.81697	0.0373864	3.07403	0.00537008	1.23059	0.400317	34.5251	0.423726	37.2691	1.12489	217.775	65.2166	34.5251	0.423726
Spot 31	127.267	91.6582	4537.05	1.3885	19.0188	4.52865	0.0390215	4.74798	0.00538487	1.42638	0.300419	34.62	0.49249	38.8683	1.81058	309.708	103.15	34.62	0.49249
Spot 135	311.292	228.545	162131	1.36206	21.5062	2.75144	0.0346102	2.95024	0.00540077	1.06465	0.36087	34.7219	0.368675	34.5481	1.00211	22.5053	NA	34.7219	0.368675
Spot 17	99.8895	96.639	3308.67	1.03364	25.3239	3.41229	0.0296097	3.68619	0.00544068	1.39438	0.37827	34.9778	0.486401	29.6287	1.07639	NA	NA	34.9778	0.486401
Spot 101	289.81	253.298	22448.1	1.14414	20.6848	2.60247	0.0364297	2.82894	0.00546758	1.10907	0.392044	35.1503	0.38878	36.3323	1.00965	115.163	61.391	35.1503	0.38878
Spot 102	81.5449	22.2284	1.02972e+06	3.6685	22.314	4.1023	0.0337821	4.40204	0.00546954	1.59658	0.362692	35.1628	0.559876	33.7351	1.46063	NA	NA	35.1628	0.559876
Spot 70	180.161	116.67	5025.75	1.5442	21.5281	4.21094	0.0354141	4.39218	0.00553184	1.2487	0.284301	35.5623	0.442845	35.3368	1.52536	20.0242	NA	35.5623	0.442845
Spot 33	225.383	111.31	7799.62	2.02483	21.1915	2.48106	0.0359946	2.64547	0.00553461	0.918089	0.347042	35.58	0.325756	35.9059	0.933281	57.7234	59.1598	35.58	0.325756
Spot 151	138.958	78.7831	6357.9	1.76381	23.609	3.24854	0.0325492	3.52215	0.00557578	1.36107	0.386432	35.844	0.486508	32.5235	1.12737	NA	NA	35.844	0.486508
Spot 141	223.979	77.3041	73290.7	2.89737	20.3546	3.54938	0.0378996	3.75692	0.00559739	1.23142	0.327772	35.9825	0.44186	37.7713	1.39297	152.98	83.161	35.9825	0.44186
Spot 119	90.1837	84.0738	27816.2	1.07267	17.6529	3.99449	0.0439191	4.40001	0.00562544	1.84505	0.419327	36.1623	0.665343	43.6431	1.87962	476.871	88.3656	36.1623	0.665343
Spot 90	33.3242	25.2353	1428.34	1.32054	2.55399	50.0004	0.431591	50.2224	0.00799796	4.71694	0.093921	51.353	2.41267	364.306	154.929	3876.27	NA	51.353	2.41267
Spot 35	904.18	49.9512	206936	18.1013	20.9686	0.989119	0.0674832	1.3926	0.0102672	0.980288	0.703929	65.8493	0.642227	66.3083	0.893901	82.8799	23.4497	65.8493	0.642227
Spot 110	392.648	224.214	35535.7	1.75122	20.3091	1.37239	0.111687	1.62392	0.0164581	0.868135	0.534592	105.232	0.906142	107.507	1.65659	158.201	32.1166	105.232	0.906142
Spot 12	73.3721	40.4916	116194	1.81203	13.4705	0.950121	1.88484	1.4375	0.184224	1.07873	0.750425	1090.01	10.818	1075.77	9.53679	1047.04	19.1775	1047.04	19.1775
Spot 57	26.2668	13.3568	112465	1.96655	13.239	1.46284	1.9257	1.99846	0.184983	1.3616	0.681323	1094.14	13.7021	1090.05	13.357	1081.9	29.3253	1081.9	29.3253
Spot 128	288.505	70.4854	394961	4.09311	11.4734	0.658401	2.91793	1.23503	0.242915	1.0449	0.846049	1401.84	13.1645	1386.57	9.33981	1363.13	12.6831	1363.13	12.6831
Spot 36	127.253	99.9129	563362	1.27364	11.1214	0.650125	3.0594	0.98391	0.246879	0.738523	0.7506	1422.36	9.42633	1422.59	7.52953	1422.91	12.4207	1422.91	12.4207
Spot 34	245.117	122.175	550465	2.00627	10.9067	0.731747	3.1841	1.17027	0.251981	0.913279	0.7804	1448.68	11.8493	1453.31	9.04299	1460.06	13.9101	1460.06	13.9101
Spot 54	362.194	141.11	223648	2.56675	10.6882	0.625791	3.29982	1.12798	0.255907	0.938472	0.831992	1468.87	12.3272	1481.01	8.78988	1498.43	11.8349	1498.43	11.8349
Spot 85	536.325	105.422	3.22003e+06	5.0874	9.77615	0.557643	3.57377	1.17745	0.253503	1.03702	0.880738	1456.51	13.5196	1543.73	9.34191	1665.26	10.3173	1665.26	10.3173
Spot 98	404.885	4.54909	420527	89.0035	9.65488	0.558119	4.03881	1.14793	0.282936	1.00312	0.87385	1606.13	14.2611	1642.05	9.34291	1688.32	10.2976	1688.32	10.2976
Spot 106	327.196	72.9751	625515	4.48367	9.50399	0.623705	4.28541	1.06002	0.29552	0.857104	0.808576	1669.05	12.6036	1690.56	8.72704	1717.33	11.4657	1717.33	11.4657
Spot 37	109.479	32.3786	367675	3.38121	9.45788	0.581531	4.67698	1.15753	0.320957	1.00085	0.864642	1794.4	15.6764	1763.13	9.68333	1726.26	10.6783	1726.26	10.6783
Spot 67	314.047	159.02	3.21175e+06	1.97488	9.36693	0.559733	4.38484	1.14518	0.298015	0.999066	0.872411	1681.46	14.7867	1709.49	9.46884	1743.98	10.2535	1743.98	10.2535
Spot 84	320.137	48.2848	303331	6.63019	9.3277	0.619656	3.8339	1.25548	0.259479	1.0919	0.86971	1487.18	14.5015	1599.89	10.1111	1751.67	11.3406	1751.67	11.3406
Spot 153	245.375	74.3088	578325	3.30209	8.97838	0.624963	5.11309	1.09126	0.333096	0.894582	0.819767	1853.37	14.4094	1838.28	9.26817	1821.23	11.34	1821.23	11.34
Spot 50	38.7612	29.3046	102662	1.3227	8.96902	0.825991	5.22083	1.31797	0.33976	1.02702	0.779248	1885.51	16.7898	1856.02	11.2317	1823.12	14.9849	1823.12	14.9849
